# Transformation of forecasts for evaluating predictive performance in an epidemiological context

Nikos I. Bosse<sup>1,2,3,\*</sup>, Sam Abbott<sup>1,2</sup>, Anne Cori<sup>4</sup>,  
Edwin van Leeuwen<sup>1,5</sup>, Johannes Bracher<sup>6,7,†</sup>, Sebastian Funk<sup>1,2,3,†</sup>

January 23, 2023

## Abstract

Forecast evaluation plays an essential role in the development cycle of predictive epidemic models and can inform their use for public health decision-making. Common scores to evaluate epidemiological forecasts are the Continuous Ranked Probability Score (CRPS) and the Weighted Interval Score (WIS), which are both measures of the absolute distance between the forecast distribution and the observation. They are commonly applied directly to predicted and observed incidence counts, but it can be questioned whether this yields the most meaningful results given the exponential nature of epidemic processes and the several orders of magnitude that observed values can span over space and time. In this paper, we argue that log transforming counts before applying scores such as the CRPS or WIS can effectively mitigate these difficulties and yield epidemiologically meaningful and easily interpretable results. We motivate the procedure threefold using the CRPS on log-transformed counts as an example: Firstly, it can be interpreted as a probabilistic version of a relative error. Secondly, it reflects how well models predicted the time-varying epidemic growth rate. And lastly, using arguments on variance-stabilizing transformations, it can be shown that under the assumption of a quadratic mean-variance relationship, the logarithmic transformation leads to expected CRPS values which are independent of the order of magnitude of the predicted quantity. Applying the log transformation to data and forecasts from the European COVID-19 Forecast Hub, we find that it changes model rankings regardless of stratification by forecast date, location or target types. Situations in which models missed the beginning of upward swings are more strongly emphasized while failing to predict a downturn following a peak is less severely penalized. We conclude that appropriate transformations, of which the natural logarithm is only one particularly attractive option, should be considered when assessing the performance of different models in the context of infectious disease incidence.

\* Correspondence to [nikos.bosse@lshtm.ac.uk](mailto:nikos.bosse@lshtm.ac.uk) † Contributed equally

<sup>1</sup>Department of Infectious Disease Epidemiology, London School of Hygiene & Tropical Medicine, London, United Kingdom

<sup>2</sup>Centre for the Mathematical Modelling of Infectious Diseases, London, United Kingdom

<sup>3</sup>NIHR Health Protection Research Unit in Modelling & Health Economics

<sup>4</sup>MRC Centre for Outbreak Analysis and Modelling, Department of Infectious Disease Epidemiology, School of Public Health, Imperial College London, London, United Kingdom

<sup>5</sup>Modelling Economics Unit and NIHR Health Protection Research Unit in Modelling & Health Economics, UK Health Security Agency, London, United Kingdom

<sup>6</sup>Chair of Statistical Methods and Econometrics, Karlsruhe Institute of Technology, Karlsruhe, Germany

<sup>7</sup>Computational Statistics Group, Heidelberg Institute for Theoretical Studies, Heidelberg, Germany

# 1 Introduction

Probabilistic forecasts (Held et al., 2017) play an important role in decision-making in epidemiology and public health (Reich et al., 2022), as well as other areas as diverse as economics (Timmermann, 2018) or meteorology (Gneiting and Raftery, 2005). Forecasts based on epidemiological modelling in particular has received widespread attention during the COVID-19 pandemic. Evaluations of forecasts can provide feedback for researchers to improve their models and train ensembles. They moreover help decision-makers distinguish good from bad predictions and choose forecasters and models that are best suited to inform future decisions.

Probabilistic forecasts are usually evaluated using so-called proper scoring rules (Gneiting and Raftery, 2007), which return a numerical score as a function of the forecast and the observed data. Proper scoring rules are constructed such that forecasters (anyone or anything that issues a forecast) are incentivised to report their true belief about the future. Examples of proper scoring rules that have been used to assess epidemiological forecasts are the Continuous Ranked Probability Score (CRPS, Gneiting and Raftery, 2007) or its discrete equivalent, the Ranked Probability Score (RPS, Funk et al., 2019), and the Weighted Interval Score (Bracher et al., 2021a). The CRPS measures the distance of the predictive distribution to the observed data as

$$\text{CRPS}(F, y) = \int_{-\infty}^{\infty} (F(x) - 1(x \geq y))^2 dx,$$

where  $y$  is the true observed value and  $F$  the cumulative distribution function (CDF) of the predictive distribution. The CRPS can be understood as a generalisation of the absolute error to predictive distributions, and interpreted on the natural scale of the data. The WIS is an approximation of the CRPS for predictive distributions represented by a set of predictive quantiles and is currently used to assess forecasts in so-called COVID-19 Forecast Hubs in the US (Cramer et al., 2020, 2021), Europe (Sherratt et al., 2022), Germany and Poland (Bracher et al., 2021b,c), as well as the US Influenza Forecasting Hub (Cdc, 2022). The WIS is defined as

$$\text{WIS}(F, y) = \frac{1}{K} \times \sum_{k=1}^K 2 \times [\mathbf{1}(y \leq q_{\tau_k}) - \tau_k] \times (q_{\tau_k} - y),$$

where  $q_{\tau}$  is the  $\tau$  quantile of the forecast  $F$ ,  $y$  is the observed outcome,  $K$  is the number of predictive quantiles provided and  $\mathbf{1}$  is the indicator function. The WIS can be decomposed into three components, dispersion, overprediction, underprediction, which reflect the width of the forecast and whether it was centred above or below the observed value. We show an alternative definition based on central prediction intervals in Section A.1 which illustrates this decomposition.

The dynamics of infectious processes are often described by the complementary concepts of the reproduction number  $R$  (Gostic et al., 2020) and growth rate  $r$  (Wallinga and Lipsitch, 2007), where  $R$  describes the strength and  $r$  the speed of epidemic growth (Dushoff and Park, 2021). In the absence of changes in immunity, behaviour or other factors that may affect the intensity of transmission, the reproduction number would be expected to remain approximately constant. In that case, the number of new infections in the population grows exponentially in time. This behaviour was observed, for example, early in the COVID-19 pandemic in many countries (Pellis et al., 2021).

If case numbers are evolving based on an exponential process and the modelling task revolves around estimating and forecasting the reproduction number or the corresponding growth rate, then evaluating forecasts based on the absolute distance between forecast and observed value penalises underprediction (of the reproduction number or growth rate) less than overprediction by the same amount. This is because for exponential processes errors on the observed value grow exponentially with the error on the estimated reproduction number or growth rate. If one is to measure the ability of forecasts to assess and forecast the underlying infection dynamics, it may thus be more desirable to evaluate errors on the growth rate directly.

Evaluating forecasts using the CRPS or WIS means that scores represent a measure of absolute errors. However, forecast consumers may find errors on a relative scale easier to interpret and more useful in order

to track predictive performance across targets of different orders of magnitude. Bolin and Wallin (2021) have proposed the scaled CRPS (SCRPS) which is locally scale invariant; however, it does not correspond to a relative error measure and lacks a straightforward interpretation as available for the CRPS.

A closely related aspect to relative scores (as opposed to absolute scores) is that in the evaluation one may wish to give similar weight to all considered forecast targets. As the CRPS typically scales with the order of magnitude of the quantity to be predicted, this is not the case for the CRPS, which will typically assign higher scores to forecast targets with high expected values (e.g., in large locations or around the peak of an epidemic). Bracher et al. (2021a) have argued that this is a desirable feature, directing attention to situations of particular public health relevance. An evaluation based on absolute errors, however, will assign little weight to other potentially important aspects, such as the ability to correctly predict future upswings while observed numbers are still low.

In many fields, it is common practice to forecast transformed quantities (see e.g. Taylor (1999) in finance, Mayr and Ulbricht (2015) in macroeconomics, Löwe et al. (2014) in hydrology or Fuglstad et al. (2015) in meteorology). While the goal of the transformations is usually to improve the accuracy of the predictions, they can also be used to enhance and complement the evaluation process. In this paper, we argue that the aforementioned issues with evaluating epidemic forecasts based on measures of absolute error on the natural scale can be addressed by transforming the forecasts and observations prior to scoring using some strictly monotonic transformation. Strictly monotonic transformations can shift the focus of the evaluation in a way that may be more appropriate for epidemiological forecasts, while preserving the propriety of the score. Many different transformations may be appropriate and useful, depending on the exact context, the desired focus of the evaluation, and specific aspects of the forecasts that forecast consumers care most about (see a broader discussion in Section 4).

For conceptual clarity and to allow for a more in-depth discussion, we focus mostly on the natural logarithm as a particular transformation (referred to as the log-transformation in the remainder of this manuscript) in the context of epidemic phenomena. Instead of a score representing the magnitude of absolute errors, applying a log-transformation prior to the CRPS yields a score which a) measures relative error (see Section 2.1), b) provides a measure for how well a forecast captures the exponential growth rate of the target quantity (see Section 2.2) and c) is less dependent on the expected order of magnitude of the quantity to be predicted (see Section 2.3). We therefore argue that such evaluations on the logarithmic scale should complement the prevailing evaluations on the natural scale. Other transformations may likewise be of interest. We briefly explore the square root transformation as an alternative transformation. Our analysis mostly focuses on the CRPS (or WIS) as an evaluation metric for probabilistic forecasts, given its widespread use throughout the COVID-19 pandemic.

The remainder of the article is structured as follows. In Sections 2.1–2.3 we provide some mathematical intuition on applying the log-transformation prior to evaluating the CRPS, highlighting the connections to relative error measures, the epidemic growth rate and variance stabilizing transformations. We then discuss practical considerations for applying transformations in general and the log-transformation in particular (Section 2.4) and the effect of the log-transformation on forecast rankings (Section 2.5). To analyse the real-world implications of the log-transformation we use forecasts submitted to the European COVID-19 Forecast Hub (European Covid-19 Forecast Hub, 2021; Sherratt et al., 2022, Section 3). Finally, we provide scoring recommendations, discuss alternative transformations that may be useful in different contexts, and suggest further research avenues (Section 4).

## 2 Logarithmic transformation of forecasts and observations

### 2.1 Interpretation as a relative error

To illustrate the effect of applying the natural logarithm prior to evaluating forecasts we consider the absolute error, which the CRPS and WIS generalize to probabilistic forecasts. We assume strictly positive support (meaning that no specific handling of zero values is needed), a restriction we will address when applying this transformation in practice. When considering a point forecast  $\hat{y}$  for a quantity of interest  $y$ , such that

$$y = \hat{y} + \varepsilon,$$

the absolute error is given by  $|\varepsilon|$ . When taking the logarithm of the forecast and the observation first, thus considering

$$\log y = \log \hat{y} + \varepsilon^*,$$

the resulting absolute error  $|\varepsilon^*|$  can be interpreted as an approximation of various common relative error measures. Using that  $\log(a) \approx a - 1$  if  $a$  is close to 1, we get

$$|\varepsilon^*| = |\log \hat{y} - \log y| = \left| \log \left( \frac{\hat{y}}{y} \right) \right| \stackrel{\text{if } \hat{y} \approx y}{\approx} \left| \frac{\hat{y}}{y} - 1 \right| = \left| \frac{\hat{y} - y}{y} \right|.$$

The absolute error after log transforming is thus an approximation of the *absolute percentage error* (APE, Gneiting, 2011) as long as forecast and observation are close. As we assumed that  $\hat{y} \approx y$ , we can also interpret it as an approximation of the *relative error* (RE)

$$\left| \frac{\hat{y} - y}{\hat{y}} \right|$$

and the *symmetric absolute percentage error* (SAPE)

$$\left| \frac{\hat{y} - y}{y/2 + \hat{y}/2} \right|.$$

As Figure 1 shows, the alignment with the SAPE is in fact the closest and holds quite well even if predicted and observed value differ by a factor of two or three. Generalising to probabilistic forecasts, the CRPS applied to log-transformed forecasts and outcomes can thus be seen as a probabilistic counterpart to the symmetric absolute percentage error, which offers an appealing intuitive interpretation.

### 2.2 Interpretation as scoring the exponential growth rate

Another interpretation for the log-transform is possible if the generative process is framed as exponential with a time-varying growth rate  $r(t)$  (see, e.g., Wallinga and Lipsitch, 2007), i.e.

$$\frac{d}{dt}y(t) = r(t)y(t)$$

which is solved by

$$y(t) = y_0 \exp \left( \int_0^t r(t') dt' \right) = y_0 \exp(\bar{r}t)$$

where  $y_0$  is an initial data point and  $\bar{r}$  is the mean of the growth rate between the initial time point 0 and time  $t$ .

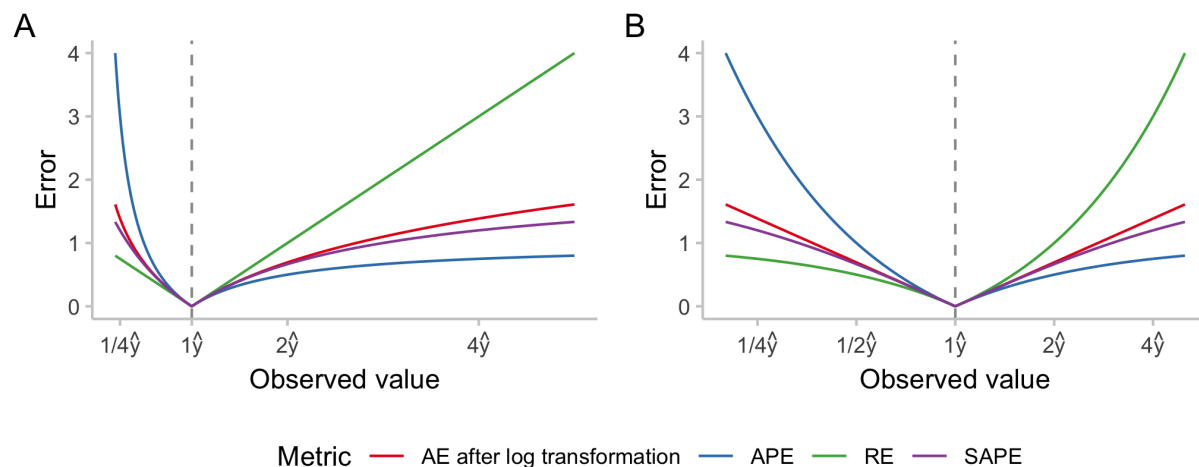

Figure 1: Numerical comparison of different measures of relative error: absolute percentage error (APE), relative error (RE), symmetric absolute percentage error (SAPE) and the absolute error applied to log-transformed predictions and observations. We denote the predicted value by  $\hat{y}$  and display errors as a function of the ratio of observed and predicted value. A: x-axis shown on a linear scale. B: x-axis shown on a logarithmic scale.

If a forecast  $\hat{y}(t)$  for the value of the time series at time  $t$  is issued at time 0 based on the data point  $y_0$  then the absolute error after log transformation is

$$\begin{aligned}\epsilon^* &= |\log [\hat{y}(t)] - \log [y(t)]| \\ &= |\log [y_0 \exp(\hat{r}t)] - \log [y_0 \exp(\bar{r}t)]| \\ &= t |\hat{r} - \bar{r}|\end{aligned}$$

where  $\hat{r}$  is the true mean growth rate and  $\bar{r}$  is the forecast mean growth rate. We thus evaluate the error in the mean exponential growth rate, scaled by the length of the time period considered. Again generalising this to the CRPS and WIS implies a probabilistic evaluation of forecasts of the epidemic growth rate.

### 2.3 Interpretation as a variance-stabilising transformation

When evaluating models across sets of forecasting tasks, it may be desirable for each target to have a similar impact on the overall results. In disease incidence forecasting, this is not the case when using the CRPS on the natural scale, as the latter typically scales with the order of magnitude of the quantity to be predicted. Average scores are then dominated by the results achieved for targets with high expected outcomes.

Specifically, if the predictive distribution for the quantity  $Y$  equals the true data-generating process  $F$  (an ideal forecast), the expected CRPS is given by (Gneiting and Raftery, 2007)

$$\mathbb{E}[\text{CRPS}(F, y)] = 0.5 \times \mathbb{E}|Y - Y'|,$$

where  $Y$  and  $Y'$  are independent samples from  $F$ . This corresponds to half the *mean absolute difference*, which is a measure of dispersion. If  $F$  is well-approximated by a normal distribution  $N(\mu, \sigma^2)$ , the approximation

$$\mathbb{E}_F[\text{CRPS}(F, y)] \approx \frac{\sigma}{\sqrt{\pi}}$$

can be used. This means that the expected CRPS scales roughly with the standard deviation, which in turn typically increases with the mean in epidemiological forecasting. In order to make the expected CRPS independent of the expected outcome, a *variance-stabilising transformation* (VST, Bartlett, 1936) can be employed. The choice of this transformation depends on the mean-variance relationship of the underlying process.

If the mean-variance relationship is quadratic with  $\sigma^2 = c \times \mu^2$ , the natural logarithm can serve as the VST (Guerrero, 1993). Denoting by  $F_{\log}$  the predictive distribution for  $\log(Y)$ , we can use the delta method to show that

$$\mathbb{E}_F[\text{CRPS}\{F_{\log}, \log(y)\}] \approx \frac{\sigma/\mu}{\sqrt{\pi}} = \frac{\sqrt{c}}{\sqrt{\pi}}.$$

The assumption of a quadratic mean-variance relationship is closely linked to the aspects discussed in Sections 2.1 and 2.2. It implies that relative errors have constant variance and can thus be meaningfully compared across different targets. Also, it arises naturally if we assume that our capacity to predict the epidemic growth rate does not depend on the expected outcome.

If the variance is linear with  $\sigma^2 = c \times \mu$ , as with a Poisson-distributed variable, the square root is known to be a VST. Denoting by  $F_{\sqrt{\cdot}}$  the predictive distribution for  $\sqrt{Y}$ , the delta method can again be used to show that

$$\mathbb{E}_F[\text{CRPS}\{F_{\sqrt{\cdot}}, \sqrt{y}\}] \approx \frac{\sigma/\sqrt{\mu}}{2\sqrt{\pi}} = \frac{\sqrt{c}}{2\sqrt{\pi}}.$$

To strengthen our intuition on how transforming outcomes prior to applying the CRPS shifts the emphasis between targets with high and low expected outcomes, Figure 2 shows the expected CRPS of ideal forecasters under different mean-variance relationships and transformations. We consider a Poisson distribution where  $\sigma^2 = \mu$ , a negative binomial distribution with size parameter  $\theta = 10$  and thus  $\sigma^2 = \mu + \mu^2/10$ , and a normal distribution with constant variance. We see that when applying the CRPS on the natural scale, the expected CRPS grows with the variance of the predictive distribution (which is equal to the data-generating distribution for the ideal forecaster). The expected CRPS is constant only for the distribution with constant variance, and grows in  $\mu$  for the other two. When applying a log-transformation first, the expected CRPS is almost independent of  $\mu$  for the negative binomial distribution and large  $\mu$ , while smaller targets have higher expected CRPS in case of the Poisson distribution and the normal distribution with constant variance. When applying a square-root-transformation before the CRPS, the expected CRPS is independent of the mean for the Poisson-distribution, but not for the other two (with a positive relationship in the normal case and a negative one for the negative binomial). As can be seen in Figures 2 and SI.3, the approximations presented above work quite well for our simulated example.

## 2.4 Practical considerations

Transformations that are strictly monotonic are permissible in the sense that they maintain the propriety of the score. This is because even though rankings of models may change forecasts will in expectation still minimise their score if they report a predictive distribution that is equal to the data-generating distribution. This condition holds for both the log and square root transformations, as well as many others. However, the order of the operations matters, and applying a transformation after scores have been computed generally does not guarantee propriety. In the case of log transforms, taking the logarithm of the scores, rather than scoring the log-transformed forecasts and data, results in an improper score. This is because taking the logarithm of the CRPS (or WIS) results in a score that does not penalise outliers enough and therefore incentivises overconfident predictions. We illustrate this point using simulated data in Figure SI.1, where it can easily be seen that overconfident models perform best in terms of the log WIS.

In practice, one issue with the log transform is that they are not readily applicable to negative numbers or zero values, which need to be removed or otherwise handled. One common approach to deal with zeros is



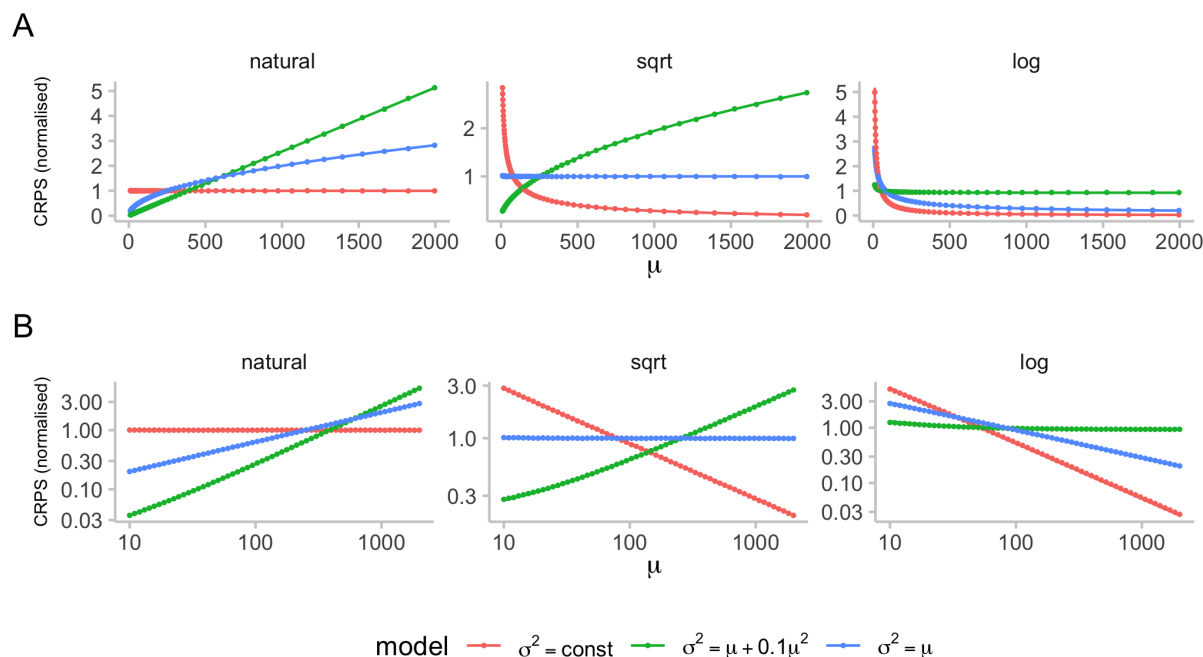

Figure 2: Expected CRPS scores as a function of the mean and variance of the forecast quantity. We computed expected CRPS values for three different distributions, assuming an ideal forecaster with predictive distribution equal to the data-generating distribution. These expected CRPS values were computed for different predictive means based on 10,000 samples each and are represented by dots. Solid lines show the corresponding approximation of the expected CRPS based on an assumed normal distribution as discussed in section 2.3. Figure SI.3 shows the quality of the approximation in more detail. The first distribution (red) is a truncated normal distribution with constant variance (we chose  $\sigma = 1$  in order to only obtain positive samples). The second (green) is a negative binomial distribution with variance  $\theta = 10$  and variance  $\sigma^2 = \mu + 0.1\mu^2$ . The third (blue) is a Poisson distribution with  $\sigma^2 = \mu$ . To make the scores for the different distributions comparable, scores were normalised to one, meaning that the mean score for every distribution (red, green, blue) is one. A: Normalised expected CRPS for ideal forecasts with increasing means for three distribution with different relationships between mean and variance. Expected CRPS was computed on the natural scale (left), after applying a square-root transformation (middle), and after adding one and applying a log-transformation to the data (right). B: A but with x axis on the log scale.

to add a small quantity, such as 1, to all observations and predictions before taking the logarithm (Bellégo et al., 2022). This represents a strictly monotonic transformation and therefore preserves the propriety of the resulting score. The choice of the quantity to add does however influences scores and rankings, as measures of relative errors shrink when adding a constant  $a$  to the forecast and the observation. We illustrate this in Figure SI.2. As a rule of thumb, if  $x > 5a$ , the difference between  $\log(x + a)$  and  $\log(x)$  is small, and it becomes negligible if  $x > 50a$ . Choosing a suitable offset  $a$  balances two competing concerns: on the one hand, choosing a small  $a$  makes sure that the transformation is as close to a natural logarithm as possible and scores can be interpreted as outlined above. On the other hand, choosing a larger  $a$  can help stabilise scores for forecasts and observations close to zero, avoiding giving excessive weight to forecasts for small quantities (see Figure SI.7).

A related issue occurs when the predictive distribution has a large probability mass on zero (or on very small values), as this can translate into an excessively wide forecast in relative terms. This can be seen in Figure SI.5. Here, the dispersion component of the WIS is inflated for scores obtained after applying the natural

logarithm because forecasts contained zero in its prediction intervals.

## 2.5 Effects on model rankings

Rankings between different forecasters based on the CRPS may change when making use of a transformation, both in terms of aggregate and individual scores. We illustrate this in Figure 3 with two forecasters, A and B, issuing two different distributions with different dispersion. When showing the obtained CRPS as a function of the observed value, it can be seen that the ranking between the two forecasters may change when scoring the forecast on the logarithmic, rather than the natural scale. In particular, on the natural scale, forecaster A, who issues a more uncertain distribution, receives a better score than forecaster B for observed values far away from the centre of the respective predictive distribution. On the log scale, however, forecaster A receives a lower score for large observed values, being more heavily penalised for assigning large probability to small values (which, in relative terms, are far away from the actual observation).

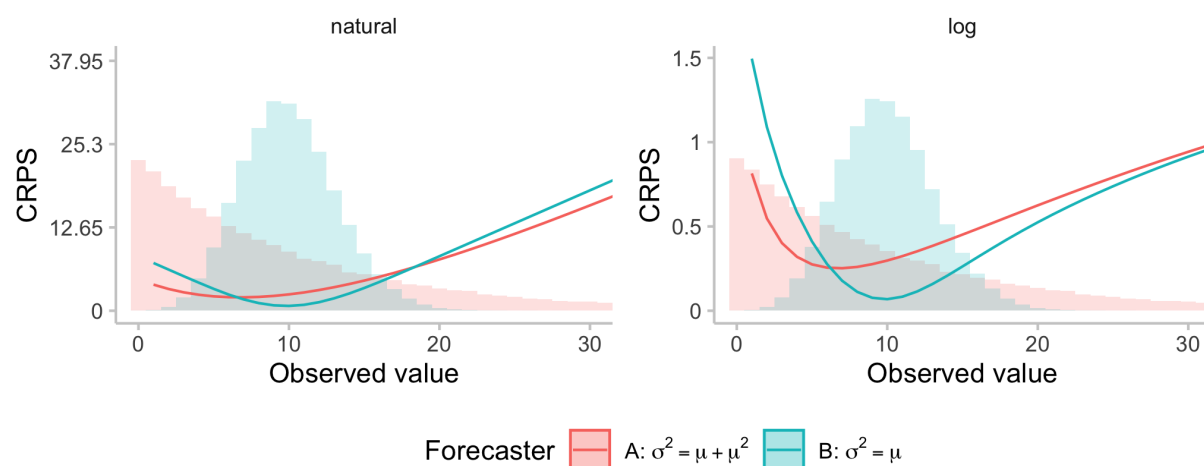

Figure 3: Illustration of the effect of the log-transformation of the ranking for a single forecast. Shown are CRPS (or WIS, respectively) values as a function of the observed value for two forecasters. Model A issues a geometric distribution (a negative binomial distribution with size parameter  $\theta = 1$ ) with mean  $\mu = 10$  and variance  $\sigma^2 = \mu + \mu^2 = 110$ , while Model B issues a Poisson distribution with mean and variance equal to 10. Zeroes in this illustrative example were handled by adding one before applying the natural logarithm.

Overall model rankings would be expected to differ even more when scores are averaged across multiple forecasts or targets. The change in rankings of aggregate scores is mainly driven by the order of magnitude of scores for different forecast targets across time, location and target type and less so by the kind of changes in model rankings for single forecasts discussed above. Large observations will dominate average CRPS values when evaluation is done on the natural scale, but much less so after log transformation. Depending on the relationship between the mean and variance of the forecast target, a log-transformation may even lead to systematically larger scores assigned to small forecast targets, as illustrated in Figure 2.



## 3 Empirical example: the European Forecast Hub

### 3.1 Setting

As an empirical comparison of evaluating forecasts on the natural and on the log scale, we use forecasts from the European Forecast Hub (European Covid-19 Forecast Hub, 2021; Sherratt et al., 2022). The European COVID-19 Forecast Hub is one of several COVID-19 Forecast Hubs (Cramer et al., 2021; Bracher et al., 2021b) which have been systematically collecting, aggregating and evaluating forecasts of several COVID-19 targets created by different teams every week. Forecasts are made one to four weeks ahead into the future and follow a quantile-based format with a set of 23 quantiles (0.01, 0.025, 0.05, ..., 0.5, ..., 0.95, 0.975, 0.99).

The forecasts used for the purpose of this illustration are forecasts submitted between the 8th of March 2021 and the 5th of December 2022 for reported cases and deaths from COVID-19. See Sherratt et al. (2022) for a more thorough description of the data. We filtered all forecasts submitted to the Hub to only include models which have submitted forecasts for both deaths and cases for 4 horizons in 32 locations on at least 46 forecast dates (see Figure SI.4). We removed all observations marked as data anomalies by the European Forecast Hub (Sherratt et al., 2022) as well as all remaining negative observed values. In addition, we filtered out erroneous forecasts defined by any of the conditions listed in Table SI.2. Those forecasts were removed in order to be better able to illustrate the effects of the log-transformation on scores and eliminating distortions caused by outlier forecasters. All predictive quantiles were truncated at 0. We applied the log-transformation after adding a constant  $a = 1$  to all predictions and observed values. The choice of  $a = 1$  in part reflects convention, but also represents a suitable choice as it avoids giving excessive weight to forecasts close to zero, while at the same time ensuring that scores for observations  $> 5$  can be interpreted reasonably. The analysis was conducted in R (R Core Team, 2022), using the `scoringutils` package (Bosse et al., 2022) for forecast evaluation. All code is available on GitHub (<https://github.com/epiforecasts/transformation-forecast-evaluation>). Where not otherwise stated, we report results for a two-week-ahead forecast horizon.

In addition to the WIS we use pairwise comparisons (Cramer et al., 2021) to evaluate the relative performance of models across countries in the presence of missing forecasts. In the first step, score ratios are computed for all pairs of models by taking the set of overlapping forecasts between the two models and dividing the score of one model by the score achieved by the other model. The relative skill for a given model compared to others is then obtained by taking the geometric mean of all score ratios which involve that model. Low values are better, and the "average" model receives a relative skill score of 1.

### 3.2 Illustration and qualitative observations

When comparing examples of forecasts on the natural scale with those on the log scale (see Figures 4, SI.5, SI.6) a few interesting patterns emerge. Missing the peak, i.e. predicting increasing numbers while actual observations are already falling, tends to contribute a lot to overall scores on the natural scale (see forecasts in May in Figure 4A, B). On the log scale, these have less of an influence, as errors are smaller in relative terms (see 4C, D). Conversely, failure to predict an upswing while numbers are still low, is less severely punished on the natural scale (see forecasts in July in Figure 4 A, B), as overall absolute errors are low. On the log scale, missing lower inflection points tends to lead to more severe penalties (see Figure 4C, D)). One can also observe that on the natural scale, scores tend to track the overall level of the target quantity (compare for example forecasts for March-July with forecasts for September-October in Figure 4E, F). On the log scale, scores do not exhibit this behaviour and rather increase whenever forecasts are far away from the truth in relative terms, regardless of the overall level of observations.

Across the dataset, the average number of observed cases and deaths varied considerably by location and target type (see Figure 5A and B). On the natural scale, scores show a pattern quite similar to the ob-

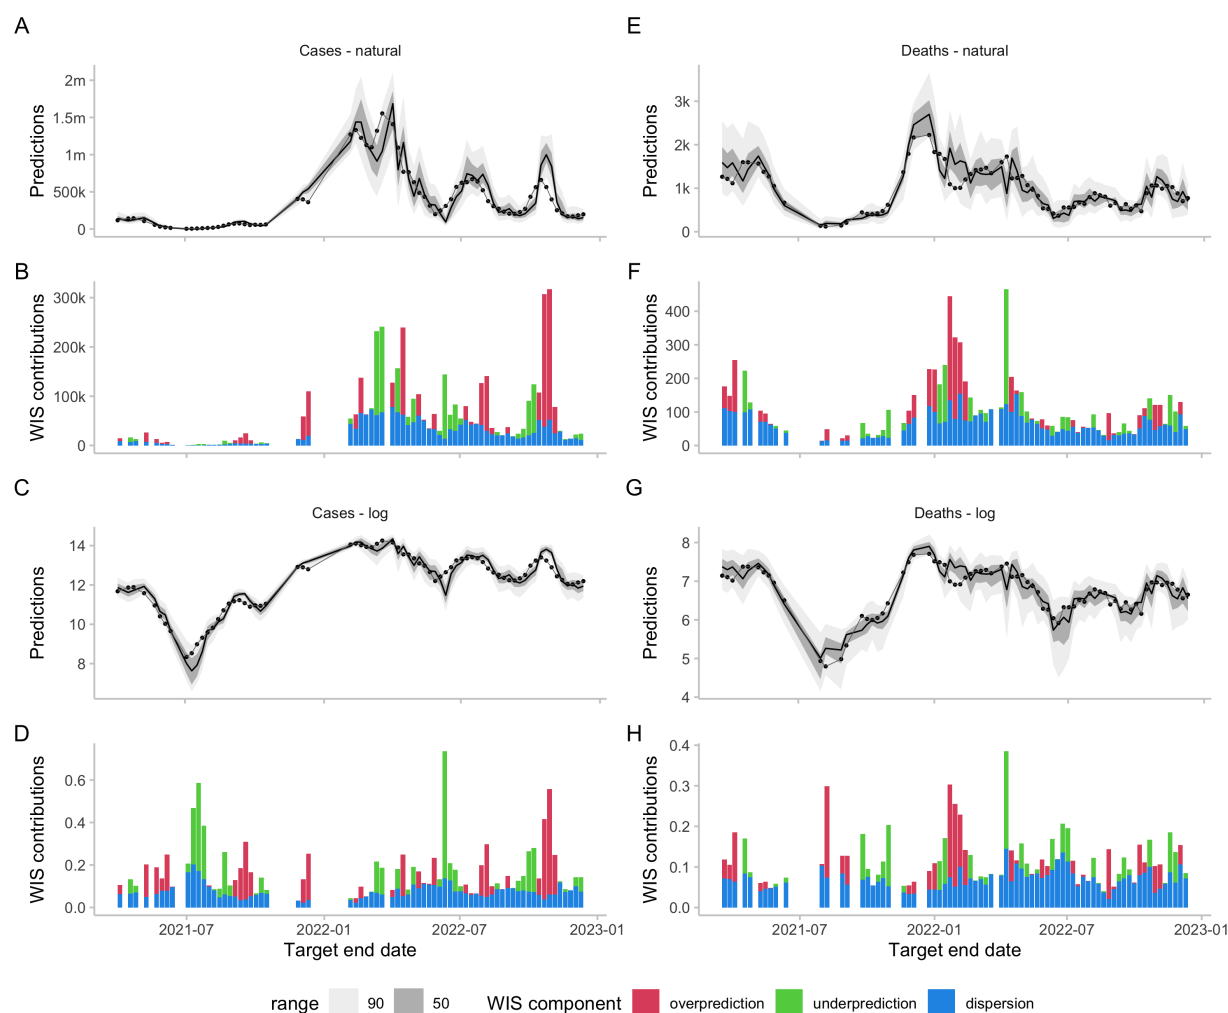

Figure 4: Forecasts and scores for two-week-ahead predictions from the EuroCOVIDhub-ensemble made in Germany. Missing values are due to data anomalies that were removed (see section 3.1. A, E: 50% and 90% prediction intervals and observed values for cases and deaths on the natural scale. B, F: Corresponding scores. C, G: Forecasts and observations on the log scale. D, H: Corresponding scores.

servations across targets (see Figure5D) and locations (see Figure5C). On the log scale, scores were more evenly distributed between targets (see Figure5D) and locations (see Figure5C). Both on the natural scale as well on the log scale, scores increased considerably with increasing forecast horizon (see Figure 5E). This reflects the increasing difficulty of forecasts further into the future and, for the log scale, corresponds with our expectations from Section 2.2.

### 3.3 Regression analysis to determine the variance-stabilizing transformation

As argued in Section 2.3, the mean-variance, or mean-CRPS, relationship determines which transformation can serve as a VST. We can analyse this relationship empirically by running a regression that explains the CRPS as a function of the central estimate of the predictive distribution. We ran the regression

$$\log[\text{CRPS}(F, y)] = \alpha + \beta \times \log[\text{median}(F)],$$

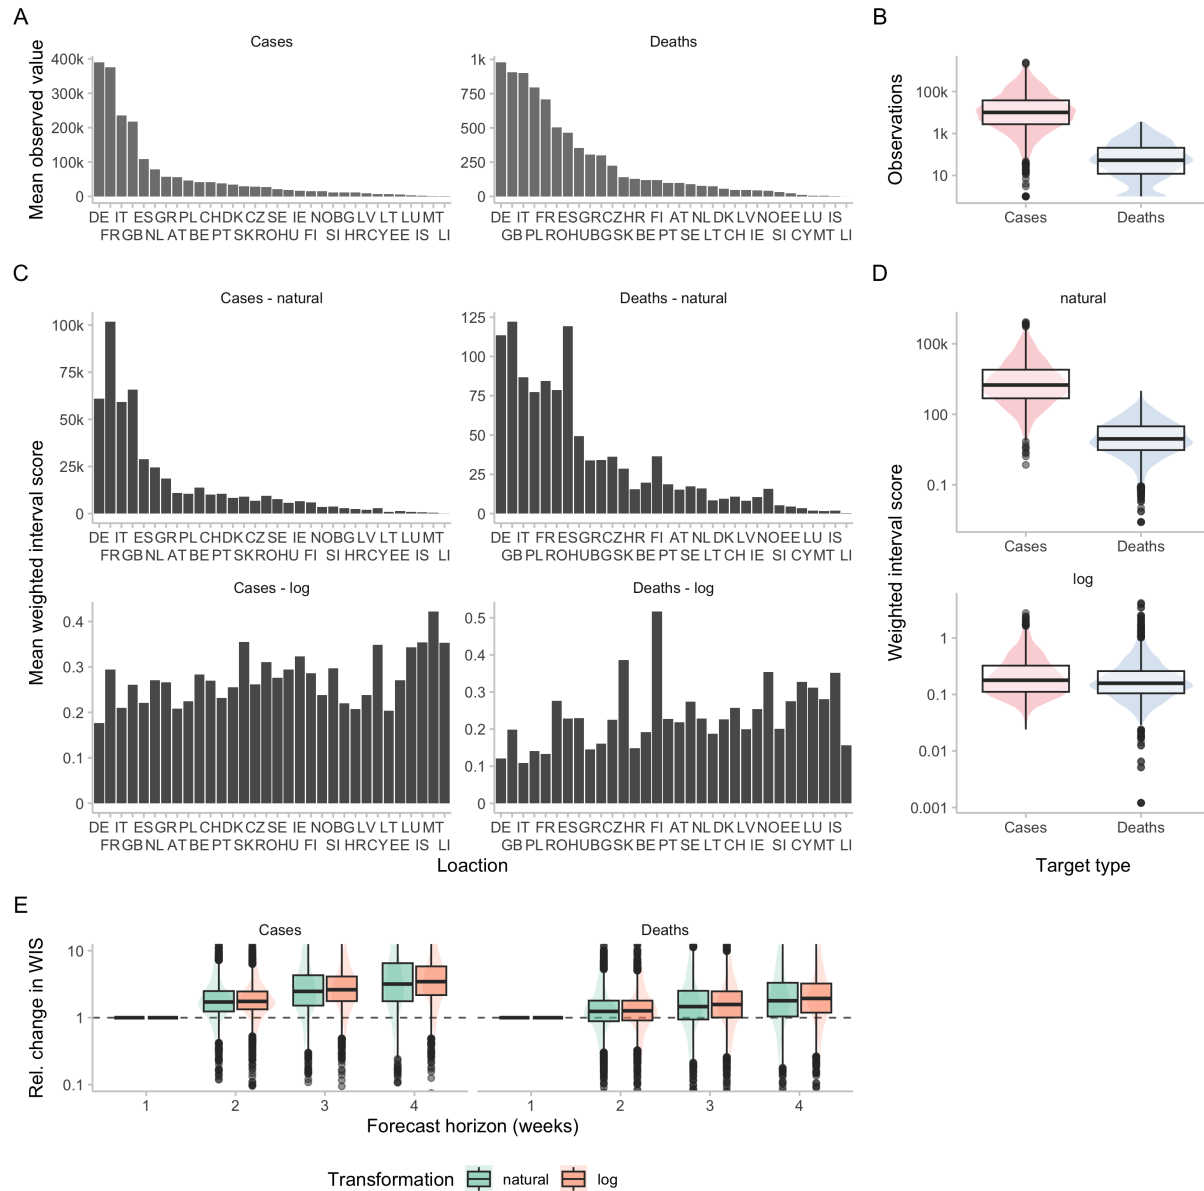

Figure 5: Observations and scores across locations and forecast horizons for the European COVID-19 Forecast Hub data. Locations are sorted according to the mean observed value in that location. A: Average (across all time points) of observed cases and deaths for different locations. B: Corresponding boxplot (y-axis on log-scale) of all cases and deaths. C: Scores for two-week-ahead forecasts from the EuroCOVIDhub-ensemble (averaged across all forecast dates) for different locations, evaluated on the natural as well as the logarithmic scale. D: Corresponding boxplots of all individual scores for two-week-ahead predictions. E: Boxplots for the relative change of scores for the EuroCOVIDhub-ensemble across forecast horizons. For any given forecast date and location, forecasts were made for four different forecast horizons, resulting in four scores. All scores were divided by the score for forecast horizon one. To enhance interpretability, the range of visible relative changes was restricted to  $[0.1, 10]$ .

where the predictive distribution  $F$  and the observation  $y$  are on the natural scale. This is equivalent to

$$\text{CRPS}(F, y) = \exp(\alpha) \times \text{median}(F)^\beta,$$

meaning that we estimate a polynomial relationship between the predictive median and achieved CRPS. Note that we are using predictive medians rather than means as only the former are available in the European COVID-19 Forecast Hub. As the CRPS of an ideal forecaster scales with the standard deviation (see Section 2.3), a value of  $\beta = 1$  would imply a quadratic median-variance relationship; the natural logarithm could then serve as a VST. A value of  $\beta 0.5$  would imply a linear median-variance relationship, suggesting the square root as a VST. We applied the regression to case and death forecasts, pooled across horizons and stratified for one through four-week-ahead forecasts. Results are provided in Table 1. It can be seen that the estimates of  $\beta$  always take a value somewhat below 1, implying a slightly sub-quadratic mean-variance relationship. The logarithmic transformation should thus approximately stabilize the variance (and CRPS), possibly leading to somewhat higher scores for smaller forecast targets. The square-root transformation, on the other hand, can be expected to still lead to higher CRPS values for targets of higher orders of magnitude.

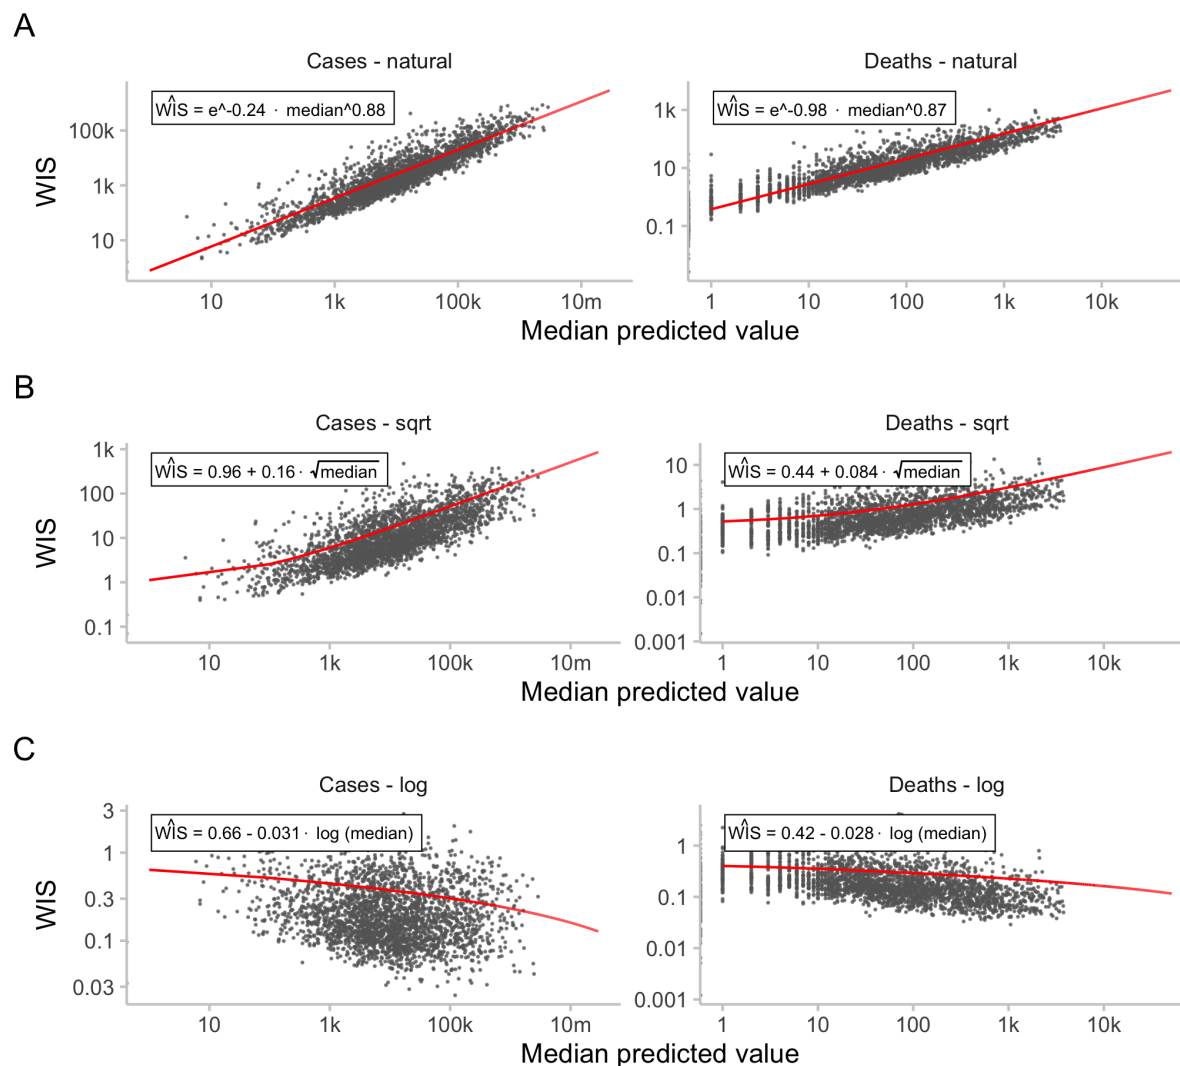

Figure 6: Relationship between median forecasts and scores. Black dots represent WIS values for two-week ahead predictions of the EuroCOVIDhub-ensemble. Shown in red are the regression lines discussed in Section 3.3 shown in Table 1. A: WIS for two-week-ahead predictions of the EuroCOVIDhub-ensemble against median predicted values. B: Same as A, with scores obtained after applying a square-root-transformation to the data. C: Same as A, with scores obtained after applying a log-transformation to the data.

| Horizon | Target | $\alpha$ | $\beta$ | $\alpha_{\sqrt{\cdot}}$ | $\beta_{\sqrt{\cdot}}$ | $\alpha_{\log}$ | $\beta_{\log}$ |
|---------|--------|----------|---------|-------------------------|------------------------|-----------------|----------------|
| all     | all    | -1.093   | 0.963   | -0.352                  | 0.201                  | 0.391           | 0.001          |
| all     | Cases  | 0.036    | 0.858   | 0.043                   | 0.201                  | 0.751           | -0.033         |
| all     | Deaths | -0.884   | 0.868   | 0.273                   | 0.121                  | 0.436           | -0.023         |
| 1       | all    | -1.402   | 0.923   | 0.320                   | 0.088                  | 0.318           | -0.014         |
| 2       | all    | -1.221   | 0.967   | 0.112                   | 0.164                  | 0.364           | -0.003         |
| 3       | all    | -1.001   | 0.984   | -0.094                  | 0.241                  | 0.410           | 0.008          |
| 4       | all    | -0.757   | 0.986   | 0.000                   | 0.299                  | 0.469           | 0.015          |
| 1       | Cases  | -0.862   | 0.876   | 0.790                   | 0.087                  | 0.433           | -0.024         |
| 2       | Cases  | -0.243   | 0.877   | 0.959                   | 0.162                  | 0.660           | -0.031         |
| 3       | Cases  | 0.372    | 0.855   | 1.109                   | 0.238                  | 0.882           | -0.037         |
| 4       | Cases  | 0.816    | 0.837   | 1.645                   | 0.296                  | 1.009           | -0.036         |
| 1       | Deaths | -1.146   | 0.832   | 0.457                   | 0.048                  | 0.376           | -0.035         |
| 2       | Deaths | -0.981   | 0.867   | 0.443                   | 0.084                  | 0.416           | -0.028         |
| 3       | Deaths | -0.807   | 0.885   | 0.349                   | 0.131                  | 0.453           | -0.019         |
| 4       | Deaths | -0.602   | 0.891   | 0.125                   | 0.194                  | 0.501           | -0.011         |

Table 1: Coefficients of three regressions for the effect of the magnitude of the median forecast on expected scores. The first regression was  $\log[\text{CRPS}(F, y)] = \alpha + \beta \times \log[\text{median}(F)]$ , where  $F$  is the predictive distribution and  $y$  the observed value. The second one was  $\text{CRPS}(F_{\log}, \log y) = \alpha_{\log} + \beta_{\log} \cdot \log(\text{median}(F))$ , where  $F_{\log}$  is the predictive distribution for  $\log y$ . The third one was  $\text{CRPS}(F_{\sqrt{\cdot}}, \sqrt{y}) = \alpha_{\sqrt{\cdot}} + \beta_{\sqrt{\cdot}} \cdot \sqrt{\text{median}(F)}$ , where  $F_{\sqrt{\cdot}}$  is the predictive distribution for  $\sqrt{y}$ .

To check the relationship after the transformation, we ran the regressions

$$\text{CRPS}(F_{\log}, \log y) = \alpha_{\log} + \beta_{\log} \cdot \log(\text{median}(F)),$$

where  $F_{\log}$  is the predictive distribution for  $\log(y)$ , and

$$\text{CRPS}(F_{\sqrt{\cdot}}, \sqrt{y}) = \alpha_{\sqrt{\cdot}} + \beta_{\sqrt{\cdot}} \cdot \sqrt{\text{median}(F)},$$

where  $F_{\sqrt{\cdot}}$  is the predictive distribution on the square-root scale. A value of  $\beta_{\log} = 0$  (or  $\beta_{\sqrt{\cdot}} = 0$ , respectively, would imply that scores are independent of the median prediction after the transformation. A value smaller (larger) than 0 would imply that smaller (larger) targets lead to higher scores. As can be seen from Table 1, the results indeed indicate that small targets lead to larger average CRPS when using the log transform ( $\beta_{\log} < 0$ ), while the opposite is true for the square-root transform ( $\beta_{\sqrt{\cdot}} > 0$ ). The results of the three regressions are also displayed in Figure 6. In this empirical example, the log transformation thus helps (albeit not perfectly), to stabilise WIS values, and it does so more successfully than the square-root transformation. As can be seen from Figure 6, the expected CRPS scores for case targets with medians of 10 and 100,000 differ by more than a factor of ten for the square root transformation, but only a factor of around 2 for the logarithm.

### 3.4 Impact of logarithmic transformation on model rankings

For *individual* forecasts, rankings between models for single forecasts are mostly preserved, with differences increasing across forecast horizons (see Figure 7A). When evaluating performance *averaged across* different forecasts and forecast targets, relative skill scores of the models change considerably (Figure 7B). The correlation between relative skill scores also decreases noticeably with increasing forecast horizon.

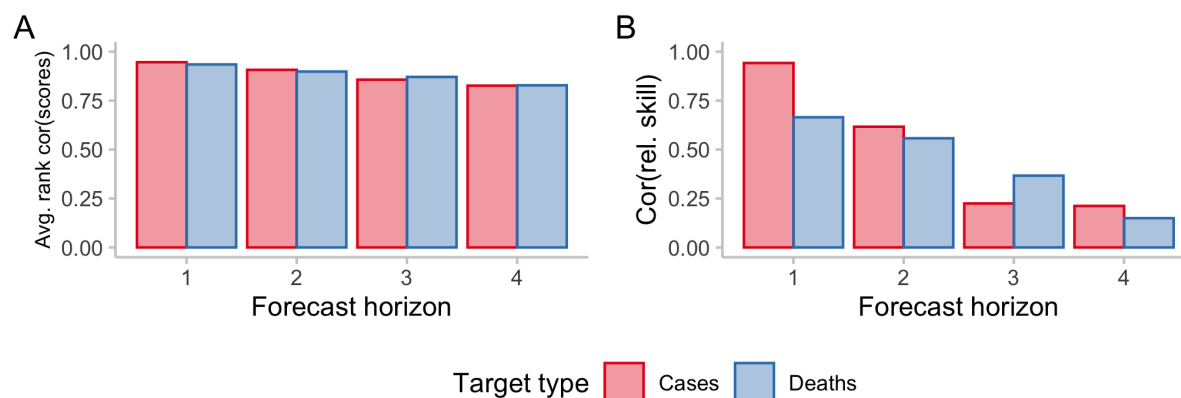

Figure 7: Correlations of rankings on the natural and logarithmic scale. A: Average Spearman rank correlation of scores for individual forecasts from all models. For every individual target (defined by a combination of forecast date, target type, horizon, location), one score was obtained per model. Then, the rank correlation was computed between the scores for all models on the natural scale vs. on the log scale. All rank correlations were averaged across locations, and target types and stratified by horizon and target type. B: Correlation between relative skill scores. For every forecast horizon and target type, a separate relative skill score was computed per model using pairwise comparisons. The plot shows the correlation between the relative skill scores on the natural vs. on the log scale.

Figure 8 shows the changes in the ranking between different forecasting models. Encouragingly for the European Forecast Hub, the Hub ensemble, which is the forecast the organisers suggest forecast consumers make use of, remains the top model across scoring schemes. For cases, the ILM-EKF model and the Forecast Hub baseline model exhibit the largest change in relative skill scores. For the ILM-EKF model the relative proportion of the score that is due to overprediction is reduced when applying a log-transformation before scoring (see Figure 8E). Instances where the model has overshot are penalised less heavily on the log scale, leading to an overall better score. For the Forecast Hub baseline model, the fact that it often puts relevant probability mass on zero (see Figure SI.5), leads to worse scores after applying log-transformation due to large dispersion penalties. For deaths, the baseline model seems to get similarly penalised for its in relative terms highly dispersed forecasts. The performance of other models changes as well, but patterns are less discernible on this aggregate level.

## 4 Discussion

In this paper, we proposed the use of transformations, with a particular focus on the natural logarithmic transformation, when evaluating forecasts in an epidemiological setting. These transformations can address issues that arise when evaluating epidemiological forecasts based on measures of absolute error and their probabilistic generalisations (i.e CRPS and WIS). We showed that scores obtained after log-transforming both forecasts and observations can be interpreted as a) a measure of relative prediction errors, as well as b) a score for a forecast of the exponential growth rate of the target quantity and c) as variance stabilising transformation in some settings. When applying this approach to forecasts from the European COVID-19 Forecast Hub, we found overall scores on the log scale to be more equal across, time, location and target type (cases, deaths) than scores on the natural scale. Scores on the log scale were much less influenced by the overall incidence level in a country and showed a slight tendency to be higher in locations with very low incidences. We found that model rankings changed noticeably.



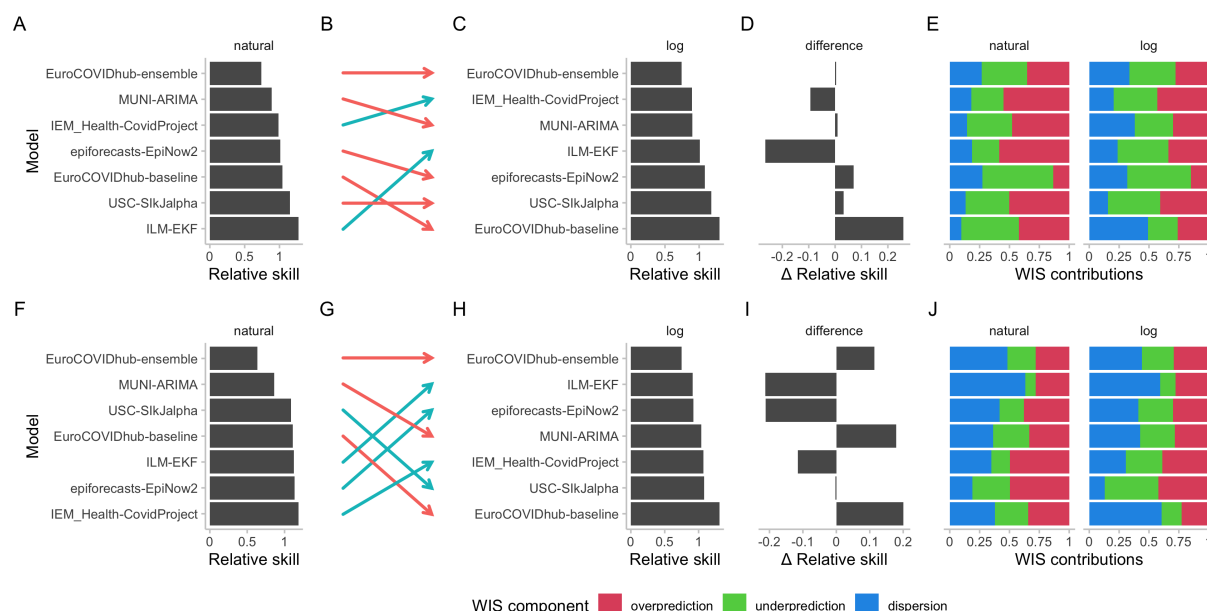

Figure 8: Changes in model ratings as measured by relative skill for two-week-ahead predictions for cases (top row) and deaths (bottom row). A: Relative skill scores for case forecasts from different models submitted to the European COVID-19 Forecast Hub computed on the natural scale. B: Change in rankings as determined by relative skill scores when moving from an evaluation on the natural scale to one on the logarithmic scale. C: Relative skill scores based on scores on the log scale. D: Difference in relative skill scores computed on the natural and on the logarithmic scale, ordered as in C. E: Relative contributions of the different WIS components (overprediction, underprediction, and dispersion) to overall model scores on the natural and the logarithmic scale. F, G, H, I, J, K: Analogously for deaths.

On the natural scale, missing the peak and overshooting was more severely penalised than missing the nadir and the following upswing in numbers. Both failure modes tended to be more equally penalised on the log scale (with undershooting receiving slightly higher penalties in our example).

Applying a log-transformation prior to the WIS means that forecasts are evaluated in terms of relative errors and errors on the exponential growth rate, rather than absolute errors. The most important strength of this approach is that the evaluation better accommodates the exponential nature of the epidemiological process and the types of errors forecasters who accurately model those processes are expected to make. The log-transformation also helps avoid issues with scores being strongly influenced by the order of magnitude of the forecast quantity, which can be an issue when evaluating forecasts on the natural scale. A potential downside is that forecast evaluation is unreliable in situations where observed values are zero or very small. Including very small values in prediction intervals (see e.g. Figure SI.5) can lead to excessive dispersion values on the log scale. Similarly, locations with lower incidences may get disproportionate weight (i.e. high scores) when evaluating forecasts on the log scale. Bracher et al. (2021a) argue that the large weight given to forecasts for locations with high incidences is a desirable property, as it reflects performance on the targets we should care about most. On the other hand, scoring forecasts on the log scale may be less influenced by outliers and better reflect consistent performance across time, space, and forecast targets. It also gives higher weight to another type of situation one may care about, namely one in which numbers start to rise from a previously low level.

The log-transformation is only one of many transformations that may be useful and appropriate in an epidemiological context. One obvious option is to apply a population standardization to obtain incidence forecasts e.g., per 100,000 population (Abbott et al., 2022). If one is interested in multiplicative, rather



than exponential growth rates, one could convert forecasts into forecasts for the multiplicative growth rate by dividing numbers by the last observed value. We suggested using the natural logarithm as a variance-stabilising transformation (VST) or alternatively the square-root transformation in the case of a Poisson distributed variable. Other VST like the Box-Cox (Box and Cox, 1964) are conceivable as well. Another promising transformation would be to take differences between forecasts on the log scale, or alternatively to divide each forecast by the forecast of the previous week (and analogously for observations), in order to obtain forecasts for week-to-week growth rates. One could then also ask forecasters to provide estimates of the weekly relative change applied to the latest data and subsequent forecast points directly. This would be akin to evaluating the shape of the predicted trajectory against the shape of the observed trajectory (for a different approach to evaluating the shape of a forecast, see Srivastava et al., 2022). This, unfortunately, is not feasible under the current quantile-based format of the Forecast Hubs, as the growth rate of the  $\alpha$ -quantile may be different from the  $\alpha$ -quantile of the growth-rate. However, it may be an interesting approach if predictive samples are available or if quantiles for weekwise growth rates have been collected. It is possible to go beyond choosing a single transformation by constructing composite scores as a weighted sum of scores based on different transformations. This would make it possible to create custom scores and allow forecast consumers to assign explicit weights to different qualities of the forecasts they might care about.

In this work, we focused on the CRPS and WIS, which are widely used in the evaluation of epidemic forecasts. We note that for the logarithmic score, which has also been used e.g., in some editions of the FluSight challenge Reich et al. (2019), the question of the right scale to evaluate forecasts does not arise. It is known that log score differences between different forecasters are invariant to monotonic transformations of the outcome variable (see e.g., Diks et al. 2011). This is clearly an advantage of the logarithmic score over the CRPS; however, the logarithmic score is known to have other severe downsides, e.g., its low robustness to sporadically misguided forecasts; see Bracher et al. (2021a) for a more detailed discussion.

Exploring transformations is a promising avenue for future work that could help bridge the gap between modellers and policymakers by providing scoring rules that better reflect what forecast consumers care about. Potentially, the variance stabilising time-series forecasting literature may be a useful source of transformations for various forecast settings. We have shown that the natural logarithm transformation can lead to significant changes in the relative rankings of models against each other, with potentially important implications for decision-makers who rely on the knowledge of past performance to make a judgement about which forecasts should inform future decisions. While it is commonly accepted that multiple proper scoring rules should usually be considered when comparing forecasts, we think this should be supplemented by considering different transformations of the data to obtain a richer picture of model performance. More work needs to be done to better understand the effects of applying transformations in different contexts, and how they may impact decision-making.

## A Supplementary information

### A.1 Alternative Formulation of the WIS

Instead of defining the WIS as an average of scores for individual quantiles, we can define it using an average of scores for symmetric predictive intervals. For a single prediction interval, the interval score (IS) is computed as the sum of three penalty components, dispersion (width of the prediction interval), underprediction and overprediction,

$$IS_{\alpha}(F, y) = (u - l) + \frac{2}{\alpha} \cdot (l - y) \cdot 1(y \leq l) + \frac{2}{\alpha} \cdot (y - u) \cdot 1(y \geq u) \\ = \text{dispersion} + \text{underprediction} + \text{overprediction},$$

where  $1(\cdot)$  is the indicator function,  $y$  is the observed value, and  $l$  and  $u$  are the  $\frac{\alpha}{2}$  and  $1 - \frac{\alpha}{2}$  quantiles of the predictive distribution, i.e. the lower and upper bound of a single central prediction interval. For a set of  $K^*$  prediction intervals and the median  $m$ , the WIS is computed as a weighted sum,

$$\text{WIS} = \frac{1}{K^* + 0.5} \cdot \left( w_0 \cdot |y - m| + \sum_{k=1}^{K^*} w_k \cdot IS_{\alpha_k}(F, y) \right),$$

where  $w_k$  is a weight for every interval. Usually,  $w_k = \frac{\alpha_k}{2}$  and  $w_0 = 0.5$ .

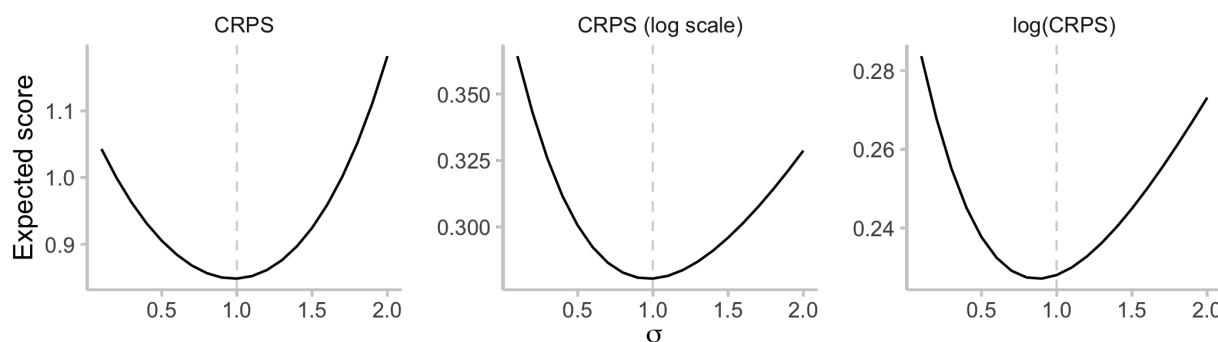

Figure SI.1: Illustration of impropriety of log-transformed CRPS. We assume  $Y \sim \text{LogNormal}(0, 1)$  and evaluate the expected CRPS for predictive distributions  $\text{LogNormal}(0, \sigma)$  with varying values of  $\sigma \in [0.1, 2]$ . For the regular CRPS (left) and CRPS applied to log-transformed outcomes (middle), the lowest expectation is achieved for the true value  $\sigma = 1$ . For the log-transformed CRPS, the optimal value is 0.9, i.e. there is an incentive to report a forecast that is too sharp.

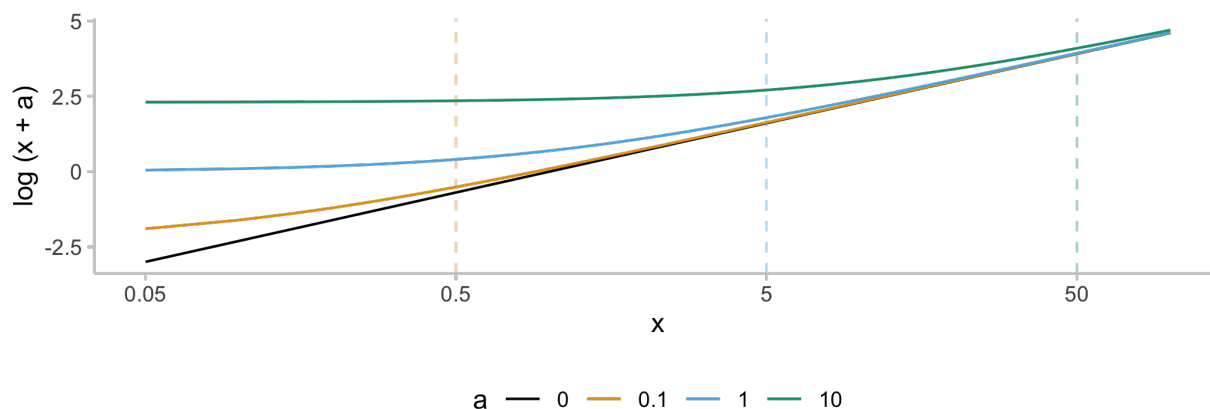

Figure SI.2: Illustration of the effect of adding a small quantity to a value before taking the natural logarithm. For increasing  $x$ , all lines eventually approach the black line (representing a transformation with no offset applied). For a given solid line, the dashed line of the same colour marks the  $x$ -value that is equal to 5 times the corresponding offset.

| target_type | quantity     | measure | natural     | log  |
|-------------|--------------|---------|-------------|------|
| Cases       | Observations | mean    | 61979       | 9.19 |
| Cases       | Observations | sd      | 171916      | 2.10 |
| Cases       | Observations | var     | 29555122130 | 4.42 |
| Deaths      | Observations | mean    | 220         | 3.89 |
| Deaths      | Observations | sd      | 435         | 1.96 |
| Deaths      | Observations | var     | 189051      | 3.83 |
| Cases       | WIS          | mean    | 15840       | 0.27 |
| Cases       | WIS          | sd      | 53117       | 0.28 |
| Deaths      | WIS          | mean    | 31          | 0.23 |
| Deaths      | WIS          | sd      | 65          | 0.28 |

Table SI.1: Summary statistics for observations and scores for forecasts from the ECDC data set.

| True value | & | Median prediction  |
|------------|---|--------------------|
| > 0        |   | > 100× true value  |
| > 10       |   | > 20× true value   |
| > 50       |   | < 1/50× true value |
| = 0        |   | > 100              |

Table SI.2: Criteria for removing forecasts. Any forecast that met one of the listed criteria (represented by a row in the table), was removed. Those forecasts were removed in order to be better able to illustrate the effects of the log-transformation on scores and eliminating distortions caused by outlier forecasters. When evaluating models against each other (rather than illustrating the effect of a transformation), one would prefer not to condition on the outcome when deciding whether a forecast should be taken into account.

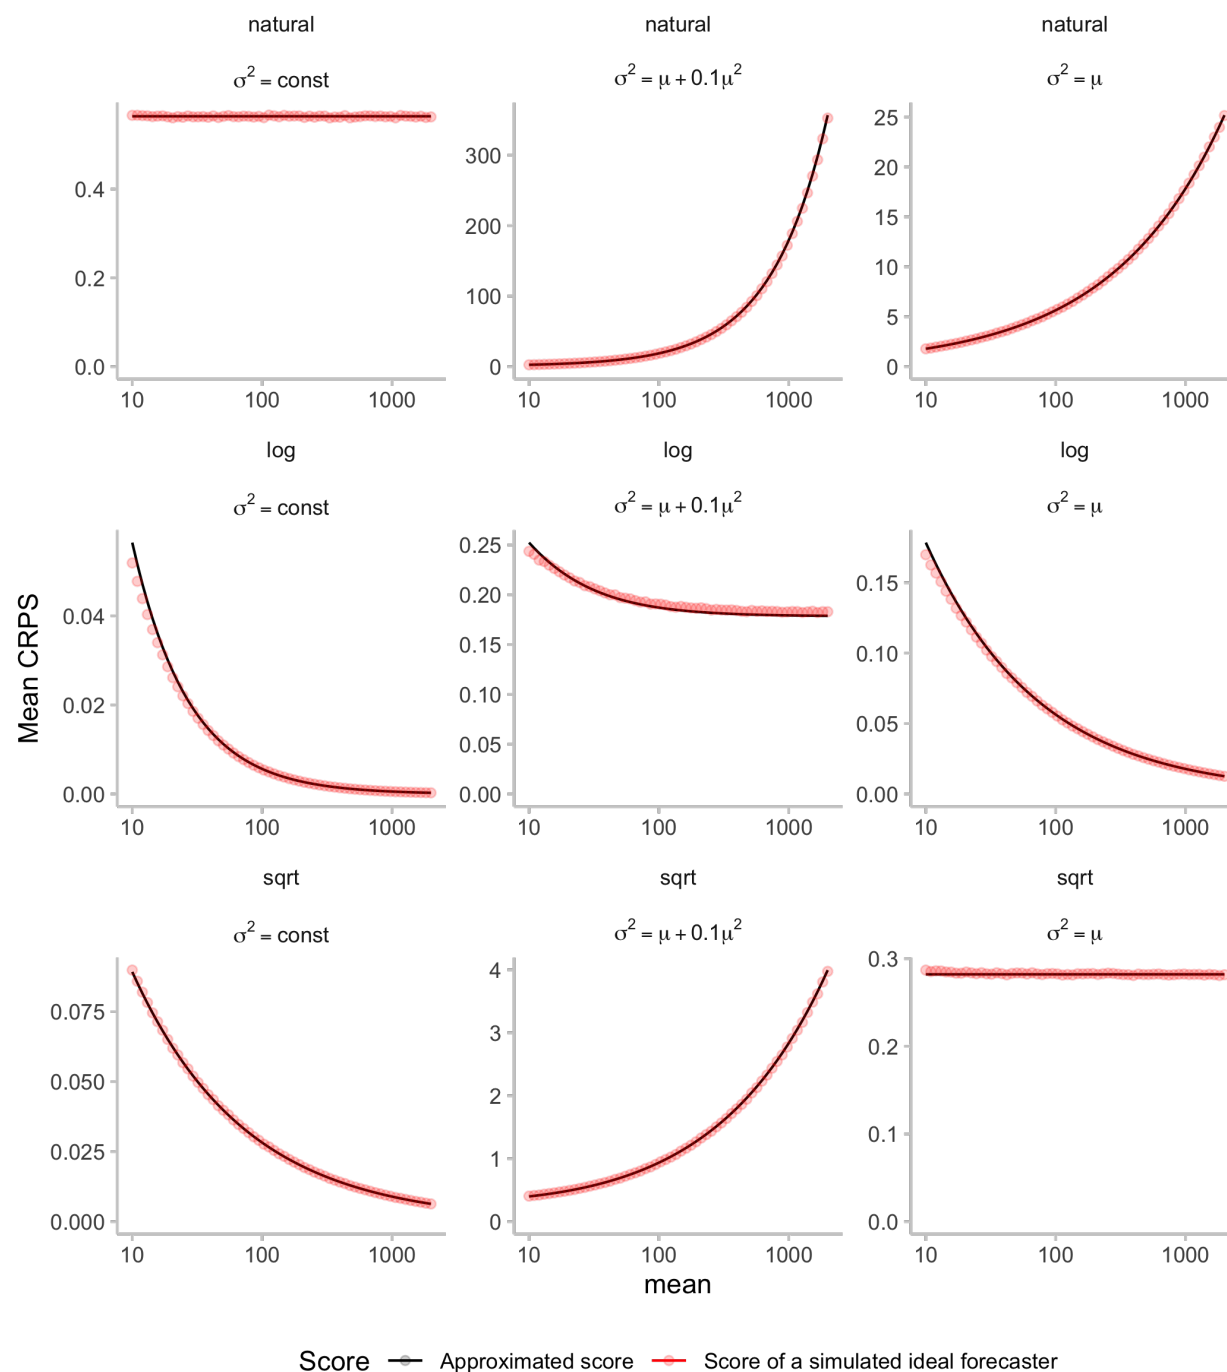

Figure SI.3: Visualisation of expected CRPS values against approximated scores using the approximation detailed in Section 2.5 (see also Figure 2). Expected CRPS scores are shown for three different distributions once on the natural scale (top row) and once scored on the log scale (bottom row).

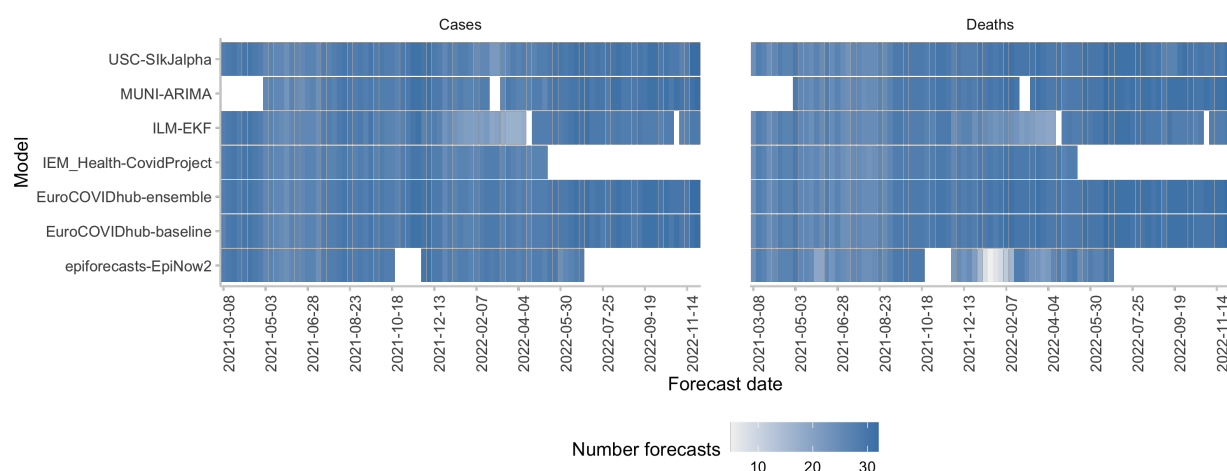

Figure SI.4: Number of forecasts available from different models for each forecast date.

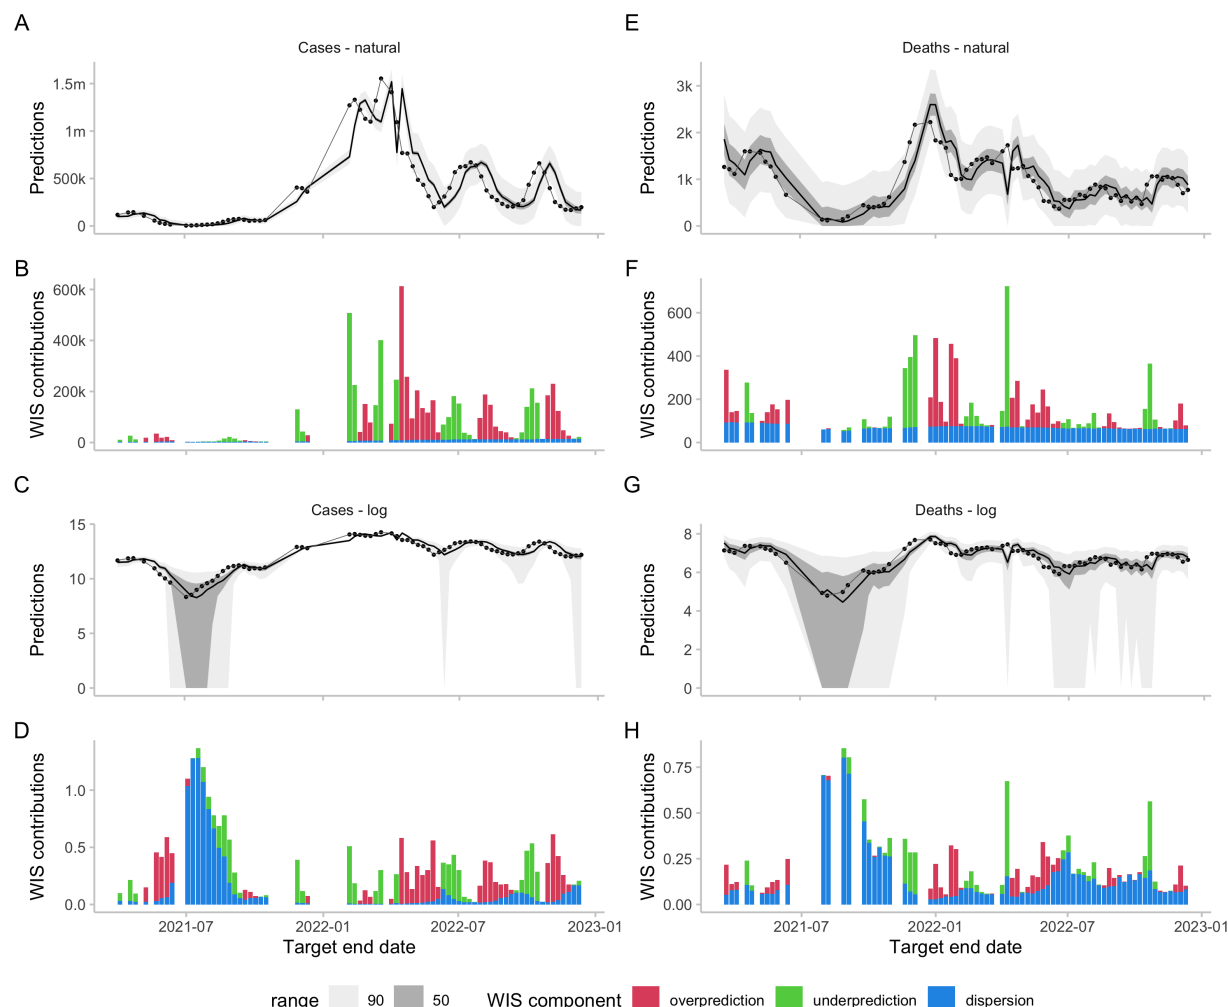

Figure SI.5: Forecasts and scores for two-week-ahead predictions from the EuroCOVIDhub-baseline made in Germany. The model had zero included in some of its 50 percent intervals (e.g. for case forecasts in July), leading to excessive dispersion values on the log scale. One could argue that including zero in the prediction intervals constituted an unreasonable forecast that was rightly penalised, but in general care has to be taken with small numbers. A, E: 50% and 90% prediction intervals and observed values for cases and deaths on the natural scale. B, F: Corresponding scores. C, G: Forecasts and observations on the log scale. D, H: Corresponding scores.

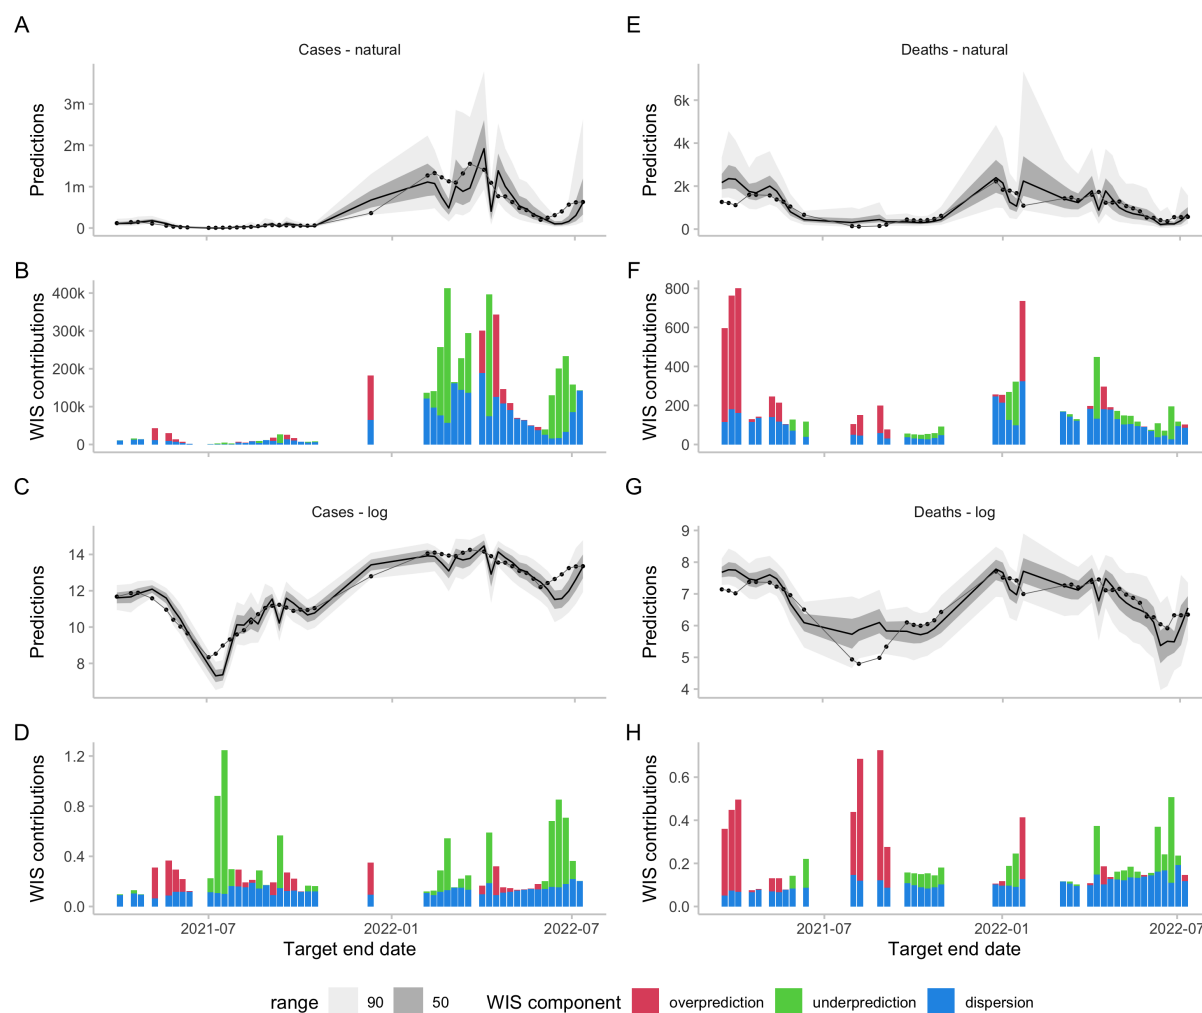

Figure SI.6: Forecasts and scores for two-week-ahead predictions from the epiforecasts-EpiNow2 model (Abbott et al., 2020) made in Germany. A, E: 50% and 90% prediction intervals and observed values for cases and deaths on the natural scale. B, F: Corresponding scores. C, G: Forecasts and observations on the log scale. D, H: Corresponding scores.



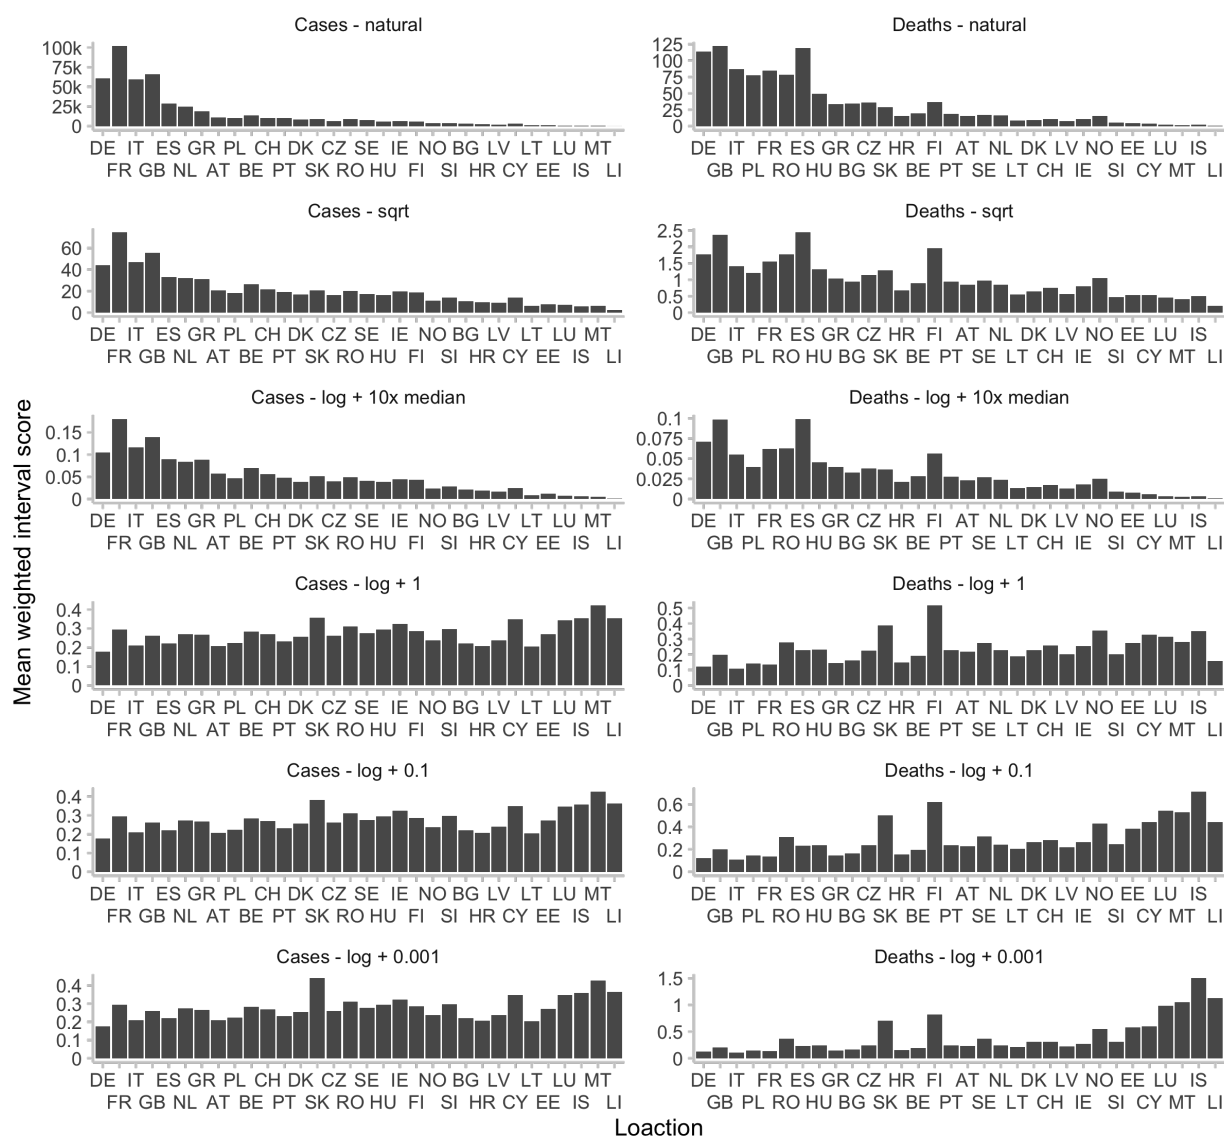

Figure SI.7: Mean WIS in different locations for different transformations applied before scoring. Shown are scores for two-week-ahead forecasts of the EuroCOVIDhub-ensemble. On the natural scale (with no transformation prior applying the WIS), scores correlate strongly with the average number of observed values in a given location. The same is true for scores obtained after applying a square-root transformation, or after applying a log-transformation with a large offset  $a$ . For illustrative purposes,  $a$  was chosen to be 101630 for cases and 530 for deaths, 10 times the respective median observed value. For large values of  $a$ ,  $\log(x + a)$  grows linearly in  $x$ , meaning that we expect to observe the same patterns as in the case with no transformation. For decreasing values of  $a$ , we give more relative weight to scores in small locations.

## References

- (2022). Cdcepi/Flusight-forecast-data. CDC Epidemic Prediction Initiative.
- Abbott, S., Hellewell, J., Sherratt, K., Gostic, K., Hickson, J., Badr, H. S., DeWitt, M., Thompson, R., EpiForecasts, and Funk, S. (2020). *EpiNow2: Estimate Real-Time Case Counts and Time-Varying Epidemiological Parameters*.
- Abbott, S., Sherratt, K., Bosse, N., Gruson, H., Bracher, J., and Funk, S. (2022). Evaluating an epidemiologically motivated surrogate model of a multi-model ensemble.
- Bartlett, M. S. (1936). The Square Root Transformation in Analysis of Variance. *Supplement to the Journal of the Royal Statistical Society*, 3(1):68–78.
- Bellégo, C., Benatia, D., and Pape, L. (2022). Dealing with Logs and Zeros in Regression Models.
- Bolin, D. and Wallin, J. (2021). Local scale invariance and robustness of proper scoring rules. *arXiv:1912.05642 [math, stat]*.
- Bosse, N. I., Gruson, H., Cori, A., van Leeuwen, E., Funk, S., and Abbott, S. (2022). Evaluating Forecasts with scoringutils in R.
- Box, G. E. P. and Cox, D. R. (1964). An Analysis of Transformations. *Journal of the Royal Statistical Society. Series B (Methodological)*, 26(2):211–252.
- Bracher, J., Ray, E. L., Gneiting, T., and Reich, N. G. (2021a). Evaluating epidemic forecasts in an interval format. *PLoS computational biology*, 17(2):e1008618.
- Bracher, J., Wolfram, D., Deuschel, J., Görgen, K., Ketterer, J. L., Ullrich, A., Abbott, S., Barbarossa, M. V., Bertsimas, D., Bhatia, S., Bodych, M., Bosse, N. I., Burgard, J. P., Castro, L., Fairchild, G., Fuhrmann, J., Funk, S., Gogolewski, K., Gu, Q., Heyder, S., Hotz, T., Kheifetz, Y., Kirsten, H., Krueger, T., Krymova, E., Li, M. L., Meinke, J. H., Michaud, I. J., Niedzielewski, K., Ożański, T., Rakowski, F., Scholz, M., Soni, S., Srivastava, A., Zieliński, J., Zou, D., Gneiting, T., and Schienle, M. (2021b). Short-term forecasting of COVID-19 in Germany and Poland during the second wave – a preregistered study. *medRxiv*, page 2020.12.24.20248826.
- Bracher, J., Wolfram, D., Deuschel, J., Görgen, K., Ketterer, J. L., Ullrich, A., Abbott, S., Barbarossa, M. V., Bertsimas, D., Bhatia, S., Bodych, M., Bosse, N. I., Burgard, J. P., Fiedler, J., Fuhrmann, J., Funk, S., Gambin, A., Gogolewski, K., Heyder, S., Hotz, T., Kheifetz, Y., Kirsten, H., Krueger, T., Krymova, E., Leithäuser, N., Li, M. L., Meinke, J. H., Miasojedow, B., Mohring, J., Nouvellet, P., Nowosielski, J. M., Ozanski, T., Radwan, M., Rakowski, F., Scholz, M., Soni, S., Srivastava, A., Gneiting, T., and Schienle, M. (2021c). National and subnational short-term forecasting of COVID-19 in Germany and Poland, early 2021.
- Cramer, E., Ray, E. L., Lopez, V. K., Bracher, J., Brennen, A., Rivadeneira, A. J. C., Gerding, A., Gneiting, T., House, K. H., Huang, Y., Jayawardena, D., Kanji, A. H., Khandelwal, A., Le, K., Mühlemann, A., Niemi, J., Shah, A., Stark, A., Wang, Y., Wattanachit, N., Zorn, M. W., Gu, Y., Jain, S., Bannur, N., Deva, A., Kulkarni, M., Merugu, S., Raval, A., Shingi, S., Tiwari, A., White, J., Woody, S., Dahan, M., Fox, S., Gaither, K., Lachmann, M., Meyers, L. A., Scott, J. G., Tec, M., Srivastava, A., George, G. E., Cegan, J. C., Dettwiller, I. D., England, W. P., Farthing, M. W., Hunter, R. H., Lafferty, B., Linkov, I., Mayo, M. L., Parno, M. D., Rowland, M. A., Trump, B. D., Corsetti, S. M., Baer, T. M., Eisenberg, M. C., Falb, K., Huang, Y., Martin, E. T., McCauley, E., Myers, R. L., Schwarz, T., Sheldon, D., Gibson, G. C., Yu, R., Gao, L., Ma, Y., Wu, D., Yan, X., Jin, X., Wang, Y.-X., Chen, Y., Guo, L., Zhao, Y., Gu, Q., Chen, J., Wang, L., Xu, P., Zhang, W., Zou, D., Biegel, H., Lega, J., Snyder, T. L., Wilson, D. D., McConnell, S., Walraven, R., Shi, Y., Ban, X., Hong, Q.-J., Kong, S., Turtle, J. A., Ben-Nun, M., Riley, P., Riley, S., Koyluoglu, U., DesRoches, D., Hamory, B., Kyriakides, C., Leis, H., Milliken, J., Moloney, M., Morgan, J., Ozcan, G., Schrader, C., Shakhnovich, E., Siegel, D., Spatz, R., Stiefeling, C., Wilkinson, B., Wong, A., Gao, Z., Bian, J., Cao, W., Ferres, J. L., Li, C., Liu, T.-Y., Xie, X., Zhang, S., Zheng,

S., Vespignani, A., Chinazzi, M., Davis, J. T., Mu, K., y Piontti, A. P., Xiong, X., Zheng, A., Baek, J., Farias, V., Georgescu, A., Levi, R., Sinha, D., Wilde, J., Penna, N. D., Celi, L. A., Sundar, S., Cavany, S., España, G., Moore, S., Oidtman, R., Perkins, A., Osthus, D., Castro, L., Fairchild, G., Michaud, I., Karlen, D., Lee, E. C., Dent, J., Grantz, K. H., Kaminsky, J., Kaminsky, K., Keegan, L. T., Lauer, S. A., Lemaître, J. C., Lessler, J., Meredith, H. R., Perez-Saez, J., Shah, S., Smith, C. P., Truelove, S. A., Wills, J., Kinsey, M., Obrecht, R. F., Tallaksen, K., Burant, J. C., Wang, L., Gao, L., Gu, Z., Kim, M., Li, X., Wang, G., Wang, Y., Yu, S., Reiner, R. C., Barber, R., Gaikadu, E., Hay, S., Lim, S., Murray, C., Pigott, D., Prakash, B. A., Adhikari, B., Cui, J., Rodríguez, A., Tabassum, A., Xie, J., Keskinocak, P., Asplund, J., Baxter, A., Oruc, B. E., Serban, N., Arik, S. O., Dusenberry, M., Epshteyn, A., Kanal, E., Le, L. T., Li, C.-L., Pfister, T., Sava, D., Sinha, R., Tsai, T., Yoder, N., Yoon, J., Zhang, L., Abbott, S., Bosse, N. I., Funk, S., Hellewel, J., Meakin, S. R., Munday, J. D., Sherratt, K., Zhou, M., Kalantari, R., Yamana, T. K., Pei, S., Shaman, J., Ayer, T., Adey, M., Chhatwal, J., Dalgic, O. O., Ladd, M. A., Linas, B. P., Mueller, P., Xiao, J., Li, M. L., Bertsimas, D., Lami, O. S., Soni, S., Bouardi, H. T., Wang, Y., Wang, Q., Xie, S., Zeng, D., Green, A., Bien, J., Hu, A. J., Jahja, M., Narasimhan, B., Rajanala, S., Rumack, A., Simon, N., Tibshirani, R., Tibshirani, R., Ventura, V., Wasserman, L., O'Dea, E. B., Drake, J. M., Pagano, R., Walker, J. W., Slayton, R. B., Johansson, M., Biggerstaff, M., and Reich, N. G. (2021). Evaluation of individual and ensemble probabilistic forecasts of COVID-19 mortality in the US. *medRxiv*, page 2021.02.03.21250974.

Cramer, E., Reich, N. G., Wang, S. Y., Niemi, J., Hannan, A., House, K., Gu, Y., Xie, S., Horstman, S., aniruddhadiga, Walraven, R., starkari, Li, M. L., Gibson, G., Castro, L., Karlen, D., Wattanachit, N., jinghuichen, zyt9lsb, aagarwal1996, Woody, S., Ray, E., Xu, F. T., Biegel, H., GuidoEspaña, X, X., Bracher, J., Lee, E., har96, and leyouz (2020). COVID-19 Forecast Hub: 4 December 2020 snapshot.

Diks, C., Panchenko, V., and van Dijk, D. (2011). Likelihood-based scoring rules for comparing density forecasts in tails. *Journal of Econometrics*, 163(2):215–230.

Dushoff, J. and Park, S. W. (2021). Speed and strength of an epidemic intervention. *Proceedings of the Royal Society B: Biological Sciences*, 288(1947):20201556.

European Covid-19 Forecast Hub (2021). European Covid-19 Forecast Hub. <https://covid19forecasthub.eu/>.

Fuglstad, G.-A., Simpson, D., Lindgren, F., and Rue, H. (2015). Does non-stationary spatial data always require non-stationary random fields? *Spatial Statistics*, 14:505–531.

Funk, S., Camacho, A., Kucharski, A. J., Lowe, R., Eggo, R. M., and Edmunds, W. J. (2019). Assessing the performance of real-time epidemic forecasts: A case study of Ebola in the Western Area region of Sierra Leone, 2014–15. *PLOS Computational Biology*, 15(2):e1006785.

Gneiting, T. (2011). Making and Evaluating Point Forecasts. *Journal of the American Statistical Association*, 106(494):746–762.

Gneiting, T. and Raftery, A. E. (2005). Weather Forecasting with Ensemble Methods. *Science*, 310(5746):248–249.

Gneiting, T. and Raftery, A. E. (2007). Strictly Proper Scoring Rules, Prediction, and Estimation. *Journal of the American Statistical Association*, 102(477):359–378.

Gostic, K. M., McGough, L., Baskerville, E., Abbott, S., Joshi, K., Tedijanto, C., Kahn, R., Niehus, R., Hay, J., de Salazar, P., Hellewell, J., Meakin, S., Munday, J., Bosse, N. I., Sherratt, K., Thompson, R. N., White, L. F., Huisman, J. S., Scire, J., Bonhoeffer, S., Stadler, T., Wallinga, J., Funk, S., Lipsitch, M., and Cobey, S. (2020). Practical considerations for measuring the effective reproductive number, Rt. *medRxiv*.

Guerrero, V. M. (1993). Time-series analysis supported by power transformations. *Journal of Forecasting*, 12(1):37–48.

Held, L., Meyer, S., and Bracher, J. (2017). Probabilistic forecasting in infectious disease epidemiology: The 13th Armitage lecture. *Statistics in Medicine*, 36(22):3443–3460.

477 Löwe, R., Mikkelsen, P. S., and Madsen, H. (2014). Stochastic rainfall-runoff forecasting: Parameter estimation,  
478 multi-step prediction, and evaluation of overflow risk. *Stochastic Environmental Research and Risk*  
479 *Assessment*, 28(3):505–516.

480 Mayr, J. and Ulbricht, D. (2015). Log versus level in VAR forecasting: 42 million empirical answers—Expect  
481 the unexpected. *Economics Letters*, 126:40–42.

482 Pellis, L., Scarabel, F., Stage, H. B., Overton, C. E., Chappell, L. H. K., Fearon, E., Bennett, E., Lythgoe,  
483 K. A., House, T. A., Hall, I., and null, n. (2021). Challenges in control of COVID-19: Short doubling time  
484 and long delay to effect of interventions. *Philosophical Transactions of the Royal Society B: Biological*  
485 *Sciences*, 376(1829):20200264.

486 R Core Team (2022). *R: A Language and Environment for Statistical Computing*. R Foundation for Statistical  
487 Computing, Vienna, Austria.

488 Reich, N. G., Brooks, L. C., Fox, S. J., Kandula, S., McGowan, C. J., Moore, E., Osthus, D., Ray, E. L.,  
489 Tushar, A., Yamana, T. K., Biggerstaff, M., Johansson, M. A., Rosenfeld, R., and Shaman, J. (2019).  
490 A collaborative multiyear, multimodel assessment of seasonal influenza forecasting in the United States.  
491 *Proceedings of the National Academy of Sciences*, 116(8):3146–3154.

492 Reich, N. G., Lessler, J., Funk, S., Viboud, C., Vespignani, A., Tibshirani, R. J., Shea, K., Schienle, M.,  
493 Runge, M. C., Rosenfeld, R., Ray, E. L., Niehus, R., Johnson, H. C., Johansson, M. A., Hochheiser, H.,  
494 Gardner, L., Bracher, J., Borchering, R. K., and Biggerstaff, M. (2022). Collaborative hubs: Making the  
495 most of predictive epidemic modeling. *American Journal of Public Health*, 112(6):839–842.

496 Sherratt, K., Gruson, H., Grah, R., Johnson, H., Niehus, R., Prasse, B., Sandman, F., Deuschel, J., Wolfram,  
497 D., Abbott, S., Ullrich, A., Gibson, G., Ray, E., Reich, N., Sheldon, D., Wang, Y., Wattanachit, N., Wang,  
498 L., Trnka, J., Obozinski, G., Sun, T., Thanou, D., Pottier, L., Krymova, E., Barbarossa, M., Leithäuser,  
499 N., Mohring, J., Schneider, J., Wlazlo, J., Fuhrmann, J., Lange, B., Rodiah, I., Baccam, P., Gurung,  
500 H., Stage, S., Suchoski, B., Budzinski, J., Walraven, R., Villanueva, I., Tucek, V., Šmíd, M., Zajíček,  
501 M., Álvarez, C. P., Reina, B., Bosse, N., Meakin, S., Loro, P. A. D., Maruotti, A., Eclerová, V., Kraus,  
502 A., Kraus, D., Pribylova, L., Dimitris, B., Li, M., Saksham, S., Dehning, J., Mohr, S., Priesemann, V.,  
503 Redlarski, G., Bejar, B., Ardenghi, G., Parolini, N., Ziarelli, G., Bock, W., Heyder, S., Hotz, T., Singh,  
504 D. E., Guzman-Merino, M., Aznarte, J., Moriña, D., Alonso, S., Álvarez, E., López, D., Prats, C., Burgard,  
505 J., Rodloff, A., Zimmermann, T., Kuhlmann, A., Zibert, J., Pennoni, F., Divino, F., Català, M., Lovison,  
506 G., Giudici, P., Tarantino, B., Bartolucci, F., Lasinio, G. J., Mingione, M., Farcomeni, A., Srivastava,  
507 A., Montero-Manso, P., Adiga, A., Hurt, B., Lewis, B., Marathe, M., Porebski, P., Venkatramanan, S.,  
508 Bartczuk, R., Dreger, F., Gambin, A., Gogolewski, K., Gruziel-Slomka, M., Krupa, B., Moszynski, A.,  
509 Niedzielewski, K., Nowosielski, J., Radwan, M., Rakowski, F., Semeniuk, M., Szczurek, E., Zielinski, J.,  
510 Kisielewski, J., Pabjan, B., Holger, K., Kheifetz, Y., Scholz, M., Bodych, M., Filinski, M., Idzikowski,  
511 R., Krueger, T., Ozanski, T., Bracher, J., and Funk, S. (2022). Predictive performance of multi-model  
512 ensemble forecasts of COVID-19 across European nations.

513 Srivastava, A., Singh, S., and Lee, F. (2022). Shape-based Evaluation of Epidemic Forecasts.

514 Taylor, J. W. (1999). Evaluating volatility and interval forecasts. *Journal of Forecasting*, 18(2):111–128.

515 Timmermann, A. (2018). Forecasting Methods in Finance. *Annual Review of Financial Economics*,  
516 10(1):449–479.

517 Wallinga, J. and Lipsitch, M. (2007). How generation intervals shape the relationship between growth rates  
518 and reproductive numbers. *Proceedings of the Royal Society B: Biological Sciences*, 274(1609):599–604.
